# Supplementary material for: Glucosamine Downregulates the IL-1β-Induced Expression of Proinflammatory Cytokine Genes in Human Synovial MH7A Cells by O-GlcNAc Modification-Dependent and -Independent Mechanisms
Source: PubMed Central journal article supplement (PMC5077170; doi:10.1371/journal.pone.0165158), 2016-10-24
Supplement: pone.0165158.s004.pdf [file pone.0165158.s004.pdf]

S1 Table. Primers used for real-time PCR

| Genes         | Forward primers                | Reverse primers              | Concentrations (nM) |
|---------------|--------------------------------|------------------------------|---------------------|
| IL-6          | 5'-GATGGCTGAAAAAGATGGATG -3'   | 5'-CAGCTCTGGCTTGTTCCTCAC-3'  | 200                 |
| IL-8          | 5'-ACACTGCGCCAACACAGAAAT-3'    | 5'-ACACTGCGCCAACACAGAAAT-3'  | 100                 |
| IL-24         | 5'-AGAATTGAGGCTGCTTGGGA-3'     | 5'-AAGGGTCTGCTGGCTAAAGTC-3'  | 200                 |
| TNF- $\alpha$ | 5'-CTCTCTAATCAGCCCTCTGGC-3'    | 5'-ATGAGGTACAGGCCCTCTGAT-3'  | 250                 |
| ADANTS-1      | 5'-GAACAAAACCGACAGAAAGCA -3    | 5'- TGTCACATTCCCTCATCGTG -3' | 200                 |
| ADAMTS-6      | 5'-GTCAGAAATGCTCAGCTACTTGTGC-3 | 5'-TTGTTCTCCATCTTTCCCTCTG-3' | 200                 |
| ADAMTS-12     | 5'-ACAGGCGAGCGCTTTATTTTC -3    | 5'-AAAGGTTTGCAAGCCAGCTC-3'   | 200                 |
| 18S           | 5'-CGGCTACCACATCCAAGGAA-3'     | 5'-GCTGGAATTACCGCGGCT-3'     | 150                 |
