# Supplementary material for: Glucosamine Downregulates the IL-1β-Induced Expression of Proinflammatory Cytokine Genes in Human Synovial MH7A Cells by O-GlcNAc Modification-Dependent and -Independent Mechanisms
Source: PubMed Central journal article supplement (PMC5077170; doi:10.1371/journal.pone.0165158), 2016-10-24
Supplement: pone.0165158.s005.pdf [file pone.0165158.s005.pdf]

S2 Table. Genes downregulated by GlcN

| Gene symbols (Fold change) |                  |                     |                 |                  |
|----------------------------|------------------|---------------------|-----------------|------------------|
| CD180 (0.19)               | KPRP (0.22)      | DIO2 (0.30)         | MIR21 (0.31)    | RGS4 (0.31)      |
| STC1 (0.33)                | MYEOV (0.33)     | DCDC2 (0.33)        | GRPR (0.34)     | IL7R (0.36)      |
| UCA1 (0.37)                | EDN1 (0.37)      | SGK1 (0.38)         | ZNF114 (0.39)   | MYPN (0.39)      |
| F3 (0.39)                  | LGR5 (0.41)      | MIR221 (0.41)       | DMBT1 (0.43)    | SNORD78 (0.43)   |
| IER3 (0.44)                | GREM1 (0.44)     | RGMB (0.45)         | TLL1 (0.45)     | SLC20A2 (0.46)   |
| IL6 (0.46)                 | SNORD75 (0.46)   | TNFAIP3 (0.47)      | PRDM1 (0.48)    | ANPEP (0.48)     |
| SPINK6 (0.49)              | SNORD44 (0.49)   | SNORD14E (0.49)     | CCBE1 (0.49)    | CCRL2 (0.49)     |
| SNORD14C (0.49)            | ADAM12 (0.49)    | TMEFF2 (0.49)       | MEST (0.50)     | FAM172B (0.50)   |
| MPP4 (0.50)                | SNORD3A (0.50)   | ANKRD1 (0.50)       | ETS2 (0.51)     | SEMA3A (0.51)    |
| FGF5 (0.51)                | FGF11 (0.51)     | BHLHE40 (0.51)      | KRTAP2-4 (0.52) | SDPR (0.52)      |
| SNORD36B (0.52)            | LOC388022 (0.52) | ADAMTS1 (0.52)      | ACSL5 (0.53)    | LOC642838 (0.53) |
| KLF10 (0.53)               | HBEGF (0.53)     | CA9 (0.53)          | SEMA3E (0.53)   | GPRC5A (0.53)    |
| SEMA3C (0.53)              | SYTL2 (0.53)     | MIRLET7A2 (0.53)    | SNORD30 (0.54)  | PDK1 (0.54)      |
| IL24 (0.54)                | FILIPIL (0.54)   | ATP8B1 (0.54)       | C7orf58 (0.54)  | KCNMB4 (0.55)    |
| SNORD22 (0.55)             | AIG1 (0.56)      | ZNF143 (0.56)       | LPXN (0.56)     | COL8A1 (0.56)    |
| SNORD29 (0.56)             | CDCP1 (0.56)     | BCAM (0.56)         | ADM (0.57)      | SNORD80 (0.57)   |
| ERRFI1 (0.57)              | LY6K (0.57)      | FABP3 (0.57)        | TPCN1 (0.57)    | ANGPTL2 (0.57)   |
| SERPINE1 (0.57)            | CYR61 (0.57)     | GPR126 (0.58)       | PFKFB4 (0.58)   | DUSP5 (0.58)     |
| KIT (0.58)                 | LST-3TM12 (0.58) | DEPDC7 (0.58)       | RDH10 (0.58)    | VEGFC (0.58)     |
| EPHA4 (0.58)               | SNORD38B (0.58)  | ADAMTS12 (0.58)     | HIVEP2 (0.59)   | CSPG4 (0.59)     |
| SLC25A37 (0.59)            | GLS (0.59)       | GABRE (0.59)        | UGCG (0.59)     | IL11 (0.59)      |
| TM4SF1 (0.60)              | MIR29A (0.60)    | DUSP6 (0.60)        | PLAT (0.60)     | DKK1 (0.60)      |
| LOC100132426 (0.60)        | KIRREL3 (0.60)   | DUSP10 (0.60)       | AQP7 (0.60)     | ZNF841 (0.60)    |
| ABCA1 (0.60)               | LOC554202 (0.61) | NT5E (0.61)         | GRAMD3 (0.61)   | THBS1 (0.61)     |
| DUSP1 (0.61)               | NEDD9 (0.61)     | RNU2-1 (0.61)       | PDP1 (0.61)     | BDKRB1 (0.61)    |
| FAP (0.61)                 | ENG (0.62)       | GJA1 (0.62)         | LMO7 (0.62)     | NUAK1 (0.62)     |
| HSPA1A (0.62)              | SNORD31 (0.62)   | LOC100133299 (0.62) | PLGLB1 (0.62)   | ANKRD13A (0.62)  |
| FRMD4A (0.62)              | AIM2 (0.63)      | PCDH15 (0.63)       | GALNT7 (0.63)   | ADAMTS6 (0.63)   |
| BNC2 (0.63)                | FBXO32 (0.63)    | HS3ST3A1 (0.64)     | RBM14 (0.64)    | PTX3 (0.64)      |
| ENO2 (0.64)                | MIR155 (0.64)    | OSMR (0.64)         | CPA4 (0.64)     | PHLDA1 (0.64)    |
| FLJ45248 (0.64)            | POP1 (0.64)      | SLC2A1 (0.64)       | HRH1 (0.64)     | COL3A1 (0.64)    |
| FST (0.65)                 | ZNF432 (0.65)    | EGR1 (0.65)         | BCL9L (0.65)    | ENC1 (0.65)      |
| FOSL2 (0.65)               | SEC14L1 (0.65)   | LAMA5 (0.65)        | HIVEP3 (0.65)   | AZIN1 (0.66)     |
| RORB (0.66)                | MAP2K3 (0.66)    | LCMT2 (0.66)        | SH2D1B (0.66)   | HIVEP1 (0.66)    |
| BMPER (0.66)               | TGM2 (0.66)      | PCYOX1L (0.66)      | MYB (0.66)      | ST3GAL1 (0.66)   |
| SNORA62 (0.66)             | PLAUR (0.66)     | CITED2 (0.66)       | ICAM1 (0.66)    | TBC1D2 (0.66)    |
| TIPARP (0.67)              | SSFA2 (0.67)     | JUNB (0.67)         | SLC4A7 (0.67)   | MUC1 (0.67)      |
| C6orf155 (0.67)            | MYOCD (0.67)     |                     |                 |                  |

GlcN-downregulated 187 genes ( $\leq 1/1.5$ -fold,  $p < 0.05$ ) are listed. Fold change was calculated as the ratio of GlcN-treated signal to nontreated signal.
