# Supplementary material for: Glucosamine Downregulates the IL-1β-Induced Expression of Proinflammatory Cytokine Genes in Human Synovial MH7A Cells by O-GlcNAc Modification-Dependent and -Independent Mechanisms
Source: PubMed Central journal article supplement (PMC5077170; doi:10.1371/journal.pone.0165158), 2016-10-24
Supplement: pone.0165158.s006.pdf [file pone.0165158.s006.pdf]

S3 Table. Genes upregulated by GlcN

| Gene symbols (Fold change) |                  |                   |                     |                   |
|----------------------------|------------------|-------------------|---------------------|-------------------|
| INHBE (8.14)               | C12orf39 (7.94)  | BEST1 (7.26)      | SLC6A9 (5.27)       | DDIT3 (4.38)      |
| IL20RB (4.08)              | WARS (3.95)      | ALDH1L2 (3.91)    | SLC7A11 (3.64)      | ASNS (3.48)       |
| SLFN5 (3.09)               | NUPR1 (3.00)     | CHAC1 (2.99)      | TRIB3 (2.93)        | HERPUD1 (2.93)    |
| GPR1 (2.84)                | PCK2 (2.74)      | SDR42E1 (2.71)    | ERO1LB (2.70)       | ULBP1 (2.70)      |
| CEBPB (2.64)               | PHGDH (2.57)     | PSAT1 (2.57)      | ZNF619 (2.56)       | FAM129A (2.52)    |
| NSAP11 (2.48)              | AARS (2.48)      | CCPG1 (2.47)      | DNAJC3 (2.40)       | SLC10A5 (2.36)    |
| SESN2 (2.35)               | GABRG1 (2.34)    | DDR2 (2.22)       | WIPI1 (2.21)        | SLC3A2 (2.20)     |
| C17orf75 (2.16)            | CTH (2.15)       | SDF2L1 (2.15)     | HYOU1 (2.14)        | SLC1A4 (2.14)     |
| MOCOS (2,14)               | DDIT4 (2.13)     | CEBPG (2.11)      | PDIA4 (2.11)        | TUBGCP3 (2.07)    |
| TSEN15 (2.06)              | HDDC3 (2.06)     | SLC35B1 (2.06)    | CBS (2.05)          | SLC16A14 (2.05)   |
| MTHFD2 (2.05)              | HCG8 (2.03)      | GOLPH3L (2.01)    | GDF15 (2.00)        | PDE5A (2.00)      |
| KLHL5 (1.99)               | TMEM50B (1.99)   | SLC16A12 (1.97)   | C5orf28 (1.97)      | GTPBP2 (1.94)     |
| CDK2AP2 (1.92)             | TCP11L2 (1.92)   | GARS (1.92)       | KRCC1 (1.92)        | IFT46 (1.92)      |
| THG1L (1.90)               | SLC33A1 (1.90)   | PXK (1.90)        | ZNF204P (1.89)      | SLC7A5 (1.89)     |
| DCP1B (1.87)               | DNAJB9 (1.86)    | SEL1L (1.86)      | TUBE1 (1.85)        | SGK3 (1.85)       |
| C11orf83 (1.84)            | HSPA5 (1.83)     | PGBD1 (1.83)      | CEP120 (1.82)       | SLC35A1 (1.82)    |
| XPOT (1.81)                | ZNF187 (1.81)    | FCRLA (1.80)      | C9orf150 (1.80)     | ZC3H6 (1.80)      |
| CARS (1.78)                | MANF (1.77)      | IL1RL1 (1.77)     | ZNF22 (1.77)        | SEC11C (1.77)     |
| RNF125 (1.76)              | ZNF70 (1.76)     | SLC30A4 (1.75)    | RHOB (1.74)         | DUSP12 (1.74)     |
| CRELD1 (1.74)              | SARS (1.74)      | DPY19L4 (1.73)    | UHRF1BP1 (1.73)     | YARS (1.73)       |
| LMO4 (1.73)                | LARP6 (1.72)     | ICT1 (1.72)       | TTC17 (1.72)        | GPT2 (1.72)       |
| DCLRE1A (1.72)             | NUCB2 (1.71)     | VEGFA (1.71)      | MARS (1.70)         | UBE2D4 (1.70)     |
| CYLD (1.70)                | C10orf57 (1.70)  | IBTK (1.70)       | LPHN3 (1.69)        | COQ5 (1.69)       |
| IFRD1 (1.69)               | C6orf48 (1.69)   | TRPM6 (1.67)      | LOC100129534 (1.67) | CSGALNACT2 (1.67) |
| ALOX5AP (1.66)             | TSC22D3 (1.66)   | DUSP16 (1.65)     | PRPSAP1 (1.65)      | LOC728819 (1.64)  |
| OR2A4 (1.64)               | MDGA2 (1.63)     | HEATR5A (1.63)    | ARHGEF2 (1.63)      | NEK3 (1.63)       |
| MAP1B (1.63)               | AAAS (1.63)      | ASS1 (1.63)       | NEK4 (1.62)         | AP1S3 (1.62)      |
| C9orf91 (1.62)             | XBP1 (1.62)      | NCRNA00171 (1.61) | ZNF311 (1.61)       | FBXO8 (1.61)      |
| TRAF6 (1.61)               | JMY (1.60)       | TRIM16L (1.60)    | MKMK2 (1.60)        | ZFP62 (1.59)      |
| JDP2 (1.59)                | ALPK1 (1.59)     | DNAJC16 (1.59)    | RAB39B (1.59)       | PRKAB2 (1.59)     |
| OR2A9P (1.58)              | DPH5 (1.58)      | TES (1.58)        | CLGN (1.58)         | ANKRD46 (1.58)    |
| PPP1R15A (1.58)            | PAN2 (1.57)      | HIST2H2AB (1.57)  | SHMT2 (1.57)        | ULK2 (1.57)       |
| POLR3B (1.56)              | FKBP9L (1.56)    | ATPAF1 (1.55)     | PRKCQ (1.55)        | SNAPIN (1.55)     |
| WDR25 (1.55)               | ZNF445 (1.55)    | CSF2RA (1.54)     | KLHL24 (1.54)       | TMEM136 (1.54)    |
| ZKSCAN3 (1.54)             | LOC554249 (1.54) | ANKRD5 (1.54)     | GOT1 (1.54)         | HSPC157 (1.53)    |
| SRD5A3 (1.53)              | EDEM1 (1.52)     | PPAPDC1B (1.52)   | HEY1 (1.52)         | ZNF581 (1.52)     |
| TRAM1 (1.52)               | B4GALT7 (1.52)   | ACTA2 (1.51)      | KIAA1529 (1.51)     | RHBDD1 (1.51)     |
| RAD1 (1.51)                | NCOA7 (1.51)     | ATPBD4 (1.51)     | BCAT1 (1.50)        | TMEM231 (1.50)    |
| SCN9A (1.50)               | CCDC101 (1.50)   | C17orf60 (1.50)   | DNAJB11 (1.50)      |                   |

GlcN-upregulated 194 genes ( $\geq 1.5$ -fold,  $p < 0.05$ ) are listed. Fold change was calculated as the ratio of GlcN-treated signal to nontreated signal.
