# Supplementary material for: Glucosamine Downregulates the IL-1β-Induced Expression of Proinflammatory Cytokine Genes in Human Synovial MH7A Cells by O-GlcNAc Modification-Dependent and -Independent Mechanisms
Source: PubMed Central journal article supplement (PMC5077170; doi:10.1371/journal.pone.0165158), 2016-10-24
Supplement: pone.0165158.s008.pdf [file pone.0165158.s008.pdf]

S5 Table. GlcN-downregulated genes, whose expression was modulated by alloxan

| Gene symbols (Ratio) |                   |                  |                   |                 |
|----------------------|-------------------|------------------|-------------------|-----------------|
| EGR1 (-1.880)        | SNORD29 (0.125)   | MIR155 (0.198)   | MYB (0.288)       | SNORD80 (0.331) |
| SNORD30 (0.353)      | JUNB(0.390)       | TM4SF1 (0.403)   | SNORA62 (0.419)   | SNORA22 (0.464) |
| DUSP6 (0.468)        | ZNF432 (0.478)    | SNORD14E (0.498) | PDK1 (0.508)      | DUSP10 (0.519)  |
| SNORD38B (0.533)     | CA9 (0.538)       | PFKFB4(0.562)    | SNORD44 (0.568)   | HBEGF (0.570)   |
| PLGLB1 (0.587)       | SNORD75 (0.594)   | FOSL2 (0.620)    | SLC2A1 (0.636)    | RBM14 (0.641)   |
| SNORD36B (0.647)     | ERRFI1 (0.647)    | DUSP1 (0.649)    | LST-3TM12 (0.666) | TNFAIP3 (0.676) |
| RDH10 (0.677)        | ENO2 (0.680)      | TIPARP (0.681)   | SNORD14C (0.697)  | ADM (0.699)     |
| SNORD78 (0.705)      | C6orf155 (0.705)  | IL11 (0.714)     | DEPDC7 (0.722)    | MYOCD (0.724)   |
| LOC100132426 (0.725) | HRH1 (0.732)      | SNORD31 (0.741)  | LOC642838 (0.742) | ICAM1 (0.750)   |
| ANGPTL2 (0.753)      | BCAM (0.754)      | ZNF143 (0.757)   | LCMT2 (0.760)     | GLS (0.763)     |
| NEDD9 (0.779)        | LOC554202 (0.779) | ABCA1 (0.782)    | LPXN (0.784)      | AZIN1 (0.785)   |
| LOC642838 (0.786)    | SGK1 (0.788)      | ANKRD13A (0.792) | DUSP5 (0.800)     | ZNF841 (0.804)  |
| SSFA2 (0.806)        | SNORD3A (0.819)   | KCNMB4 (0.820)   | HIVEP2 (0.825)    | SPINK6 (0.828)  |
| KLF10 (0.832)        | MIR221 (0.839)    | SYTL2 (0.846)    | DMBT1 (0.851)     | BHLHE40 (0.852) |
| IL24 (0.866)         | GRAMD3 (0.870)    | ZNF114 (0.873)   | GREM1 (0.884)     | PCYOX1L (0.891) |
| GPRC5A (0.903)       | FAM172B (0.912)   | HS3ST3A1 (0.912) | DIO2 (0.913)      | MYPN (0.920)    |
| BDKRB1 (0.922)       | IER3 (0.934)      | MEST (0.936)     | FLJ45248 (0.939)  | LY6K (0.942)    |
| MIR29A (0.945)       | SLC20A2 (0.950)   | UCA1 (0.965)     | MUC1 (0.967)      | RNU2-1 (0.969)  |
| CCRL2 (0.971)        | RGS4 (0.981)      | ETS2 (0.982)     | FGF5 (0.982)      | SLC4A7 (0.987)  |
| MIR21 (0.993)        | CITED2 (0.994)    | GABRE (0.995)    | POP1 (0.998)      | FST (0.999)     |

Among GlcN-downregulated 187 genes ( $\leq 1/1.5$ -fold,  $p < 0.05$ ), genes whose expression was restored by alloxan are listed. To assess the effect of alloxan, the ratio (the changes of mRNA expression in the presence of both GlcN and alloxan/the changes in the presence of GlcN) was calculated and the value of  $< 1.0$  was defined as the restoration by alloxan.
