# Supplementary material for: Glucosamine Downregulates the IL-1β-Induced Expression of Proinflammatory Cytokine Genes in Human Synovial MH7A Cells by O-GlcNAc Modification-Dependent and -Independent Mechanisms
Source: PubMed Central journal article supplement (PMC5077170; doi:10.1371/journal.pone.0165158), 2016-10-24
Supplement: pone.0165158.s009.pdf [file pone.0165158.s009.pdf]

S6 Table. GlcN-upregulated genes, whose expression was modulated by alloxan

| Gene symbols (Ratio) |                   |                    |                      |                  |
|----------------------|-------------------|--------------------|----------------------|------------------|
| ATPBD4 (-0.075)      | LPHN3 (-0.066)    | MDGA2 (0.155)      | C17orf60 (0.050)     | C9orf150 (0.064) |
| ALPK1 (0.163)        | MAP1B (0.199)     | SCN9A (0.203)      | PDE5A (0.208)        | BCAT1 (0.211)    |
| IL20RB (0.219)       | FCRLA (0.220)     | GTPBP2 (0.249)     | TCP11L2 (0.259)      | ALOX5AP (0.268)  |
| SLC16A12 (0.272)     | INHBE (0.277)     | ASS1 (0.282)       | HEY1 (0.285)         | RHBDD1 (0.289)   |
| GABRG1 (0.300)       | IFRD1 (0.346)     | CBS (0.352)        | LOC100129534 (0.374) | RAB39B (0.379)   |
| SLFN5 (0.385)        | GPR1 (0.387)      | BEST1 (0.396)      | C12orf39 (0.417)     | MOCOS (0.423)    |
| ALDH1L2 (0.424)      | IBTK (0.428)      | DDR2 (0.429)       | FAM129A (0.440)      | JDP2 (0.440)     |
| SLC6A9 (0.441)       | OR2A9P (0.450)    | CSF2RA (0.470)     | TRIB3 (0.475)        | PAN2 (0.478)     |
| TSEN15 (0.482)       | IL1RL1 (0.492)    | FKBP9L (0.496)     | OR2A7 (0.519)        | PCK2 (0.521)     |
| SLC7A5 (0.531)       | ARHGEF2 (0.535)   | KRCC1 (0.544)      | TES (0.548)          | WIPI1 (0.549)    |
| POLR3B (0.549)       | TTC17 (0.554)     | HSPC157 (0.557)    | CLGN (0.562)         | SLC7A11 (0.565)  |
| CEBPB (0.571)        | TSC22D3 (0.572)   | KLHL5 (0.577)      | VEGFA (0.577)        | NUCB2 (0.578)    |
| YARS (0.582)         | HEATR5A (0.584)   | PSAT1 (0.593)      | LARP6 (0.596)        | PDIA4 (0.597)    |
| GARS (0.598)         | CARS (0.609)      | SEL1L (0.625)      | NUPR1 (0.629)        | CHAC1 (0.639)    |
| WDR25 (0.658)        | C10orf57 (0.661)  | SLC1A4 (0.663)     | CRELD1 (0.664)       | XBP1 (0.669)     |
| SLC33A1 (0.669)      | MARS (0.671)      | HCG8 (0.672)       | WARS (0.672)         | DPH5 (0.674)     |
| NCOA7 (0.683)        | AARS (0.693)      | NSAP11 (0.702)     | TRPM6 (0.704)        | HYOU1 (0.706)    |
| TRIM16L (0.709)      | SDF2L1 (0.713)    | ZC3H6 (0.722)      | DNAJC16 (0.723)      | SARS (0.727)     |
| DDIT4 (0.734)        | DDIT3 (0.736)     | CTH (0.748)        | GOT1 (0.750)         | CCPG1 (0.751)    |
| SEC11C (0.762)       | MANF (0.762)      | ASNS (0.763)       | LMO4 (0.763)         | SHMT2 (0.765)    |
| HERPUD1 (0.773)      | LOC554249 (0.779) | RHOB (0.784)       | PXK (0.787)          | CDK2AP2 (0.788)  |
| COQ5 (0.790)         | XPOT (0.793)      | PHGDH (0.801)      | AP1S3 (0.803)        | DNAJC3 (0.804)   |
| CEBPG (0.804)        | ACTA2 (0.836)     | ANKRD5 (0.836)     | B4GALT7 (0.838)      | EDEM1 (0.840)    |
| UHRF1BP1 (0.847)     | GPT2 (0.866)      | DUSP16 (0.873)     | HDDC3 (0.879)        | TRAM1 (0.900)    |
| HSPA5 (0.910)        | SGK3 (0.916)      | ULK2 (0.920)       | MTHFD2 (0.926)       | ULBP1 (0.928)    |
| SESN2 (0.929)        | C5orf28 (0.940)   | NCRNA00171 (0.945) | C9orf91 (0.947)      | UBE2D4 (0.948)   |
| MKNK2 (0.948)        | TMEM50B (0.950)   | ZNF70 (0.958)      | DNAJB9 (0.962)       | SRD5A3 (0.968)   |
| AAAS (0.970)         | PPAPDC1B (0.977)  | GOLPH3L (0.987)    | KIAA1529 (0.998)     |                  |

Among GlcN-upregulated 194 genes ( $\geq 1.5$ -fold,  $p < 0.05$ ), genes whose expression was restored by alloxan are listed. To assess the effect of alloxan, the ratio (the changes of mRNA expression in the presence of both GlcN and alloxan/the changes in the presence of GlcN) was calculated and the value of  $< 1.0$  was defined as the restoration by alloxan.
