# Supplementary material for: Glucosamine Downregulates the IL-1β-Induced Expression of Proinflammatory Cytokine Genes in Human Synovial MH7A Cells by O-GlcNAc Modification-Dependent and -Independent Mechanisms
Source: PubMed Central journal article supplement (PMC5077170; doi:10.1371/journal.pone.0165158), 2016-10-24
Supplement: pone.0165158.s010.pdf [file pone.0165158.s010.pdf]

S7 Table. Ct values from quantitative real-time RT-PCR

|               | IL-1 $\beta$     | GlcN             | Alloxan          | -                | +                | - | + | - | + |
|---------------|------------------|------------------|------------------|------------------|------------------|---|---|---|---|
| TNF- $\alpha$ | 29.43 $\pm$ 0.23 | 29.1 $\pm$ 0.37  | 30.3 $\pm$ 0.32  | 29.31 $\pm$ 0.33 | 28.13 $\pm$ 0.36 |   |   |   |   |
| IL-8          | 27.43 $\pm$ 0.53 | 25.24 $\pm$ 0.58 | 25.66 $\pm$ 0.54 | 24.32 $\pm$ 0.62 | 24.86 $\pm$ 0.95 |   |   |   |   |
| IL-6          | 27.43 $\pm$ 0.30 | 25.61 $\pm$ 0.28 | 27.09 $\pm$ 0.08 | 27.72 $\pm$ 0.20 | 25.84 $\pm$ 0.09 |   |   |   |   |
| IL-24         | 27.82 $\pm$ 0.33 | 27.56 $\pm$ 0.39 | 28.09 $\pm$ 0.24 | 27.98 $\pm$ 0.08 | 27.88 $\pm$ 0.30 |   |   |   |   |
| ADAMTS-1      | 22.91 $\pm$ 0.35 | 23.88 $\pm$ 0.47 | 23.98 $\pm$ 0.45 |                  |                  |   |   |   |   |
| ADAMTS-6      | 32.12 $\pm$ 0.80 | 32.33 $\pm$ 0.65 | 32.41 $\pm$ 0.48 |                  |                  |   |   |   |   |
| ADAMTS-12     | 22.85 $\pm$ 0.24 | 22.93 $\pm$ 0.23 | 23.39 $\pm$ 0.25 |                  |                  |   |   |   |   |

Data are mean  $\pm$  S.E. of four to eight separate experiments.
