# Supplementary material for: Glucosamine Downregulates the IL-1β-Induced Expression of Proinflammatory Cytokine Genes in Human Synovial MH7A Cells by O-GlcNAc Modification-Dependent and -Independent Mechanisms
Source: PLoS One. 2016 Oct 24;11(10):e0165158. doi: 10.1371/journal.pone.0165158 (PMC5077170; doi:10.1371/journal.pone.0165158)
Supplement: S4 Table — (PDF) [file pone.0165158.s007.pdf]

S4 Table. Detailed data from the DNA microarray analysis

# Notes : Created from Advanced Analysis operation: significance Analysis.

#Entitylist : SOMEYA GlcN n=3 Filtered on Expression 24216

#Interpretation : MHTA GlcN

#Experiment : SOMEYA n=3

#corrected p-value cut-off:0.05

#Fold change cut-off:1.5

#Selected Test : T Test unpaired

#p-value computation: Asymptotic

#Multiple Testing Correction: No Correction

#

# Technology : Affymetrix,ExonExpsChip,HuGene-1\_0-st-v1\_na31\_hgl9\_2010-09-03

# Owner : gusner

# Created On : Fri Nov 04 10:54:55 JST 2011

| Transcripts | Cluster Id  | p-value (Control vs GlcN) | Gene Symbol | Gene Title                                                                 | fold change | regulation | [Resting](raw) | [Control](raw) | [GlcN](raw) | [GlcN + Allo](raw) | [Alloxan](raw) | Effect of Alloxan | [Resting](normalized) | [Control](normalized) | [GlcN](normalized) | [GlcN + Allo](normalized) | [Alloxan](normalized) |
|-------------|-------------|---------------------------|-------------|----------------------------------------------------------------------------|-------------|------------|----------------|----------------|-------------|--------------------|----------------|-------------------|-----------------------|-----------------------|--------------------|---------------------------|-----------------------|
| 8112428     | 9.81E-04    |                           | CD180       | CD180 molecule                                                             | 0.193964823 | down       | 246.07048      | 305.45786      | 57.45047    | 48.873547          | 77.37064       | 1.034583336       | -0.27383438           | 0.039085228           | -2.3270478         | -2.5702493                | -1.8993503            |
| 7905515     | 0.006223375 |                           | KPRP        | keratinocyte proline-rich protein                                          | 0.22335493  |            | 964.0971       | 916.02783      | 190.62123   | 156.28757          | 386.90723      | 1.047330228       | -0.23865764           | -0.37154612           | -2.534136          | -2.8325756                | -1.562776             |
| 7980485     | 0.006589807 |                           | DIO2        | deiodinase, iodothyronine, type II                                         | 0.301689431 | down       | 348.01123      | 391.61118      | 115.87063   | 139.93553          | 277.70145      | 0.912726293       | -0.07580694           | 0.08176104            | -1.647103          | -1.3567156                | -0.37040153           |
| 8008885     | 0.00511392  |                           | MIR21       | microRNA 21                                                                | 0.311376495 | down       | 328.31882      | 541.65704      | 163.79868   | 166.43651          | 398.9946       | 0.993018998       | -0.79659873           | -0.084339775          | -1.7676078         | -1.7551119                | -0.5485514            |
| 7906919     | 0.004879    |                           | RGS4        | regulator of G-protein signaling 4                                         | 0.312437962 | down       | 595.8677       | 562.052        | 170.94128   | 178.49202          | 346.11426      | 0.980694111       | -0.003556569          | -0.06483523           | -1.7431935         | -1.6920047                | -0.75075865           |
| 8149825     | 7.70E-04    |                           | STC1        | stanniocalcin 1                                                            | 0.327394828 | down       | 540.55115      | 592.4129       | 195.99908   | 190.00049          | 344.50354      | 1.015132141       | -0.114629425          | 0.015451114           | -1.5954455         | -1.634569                 | -0.76559705           |
| 7942118     | 0.021816032 |                           | MYEOV       | myeloma overexpressed (in a subset of t(11;14) positive multiple myelomas) | 0.332834437 | down       | 696.8137       | 850.91974      | 261.5495    | 209.88118          | 436.5808       | 1.087666999       | -0.012605667          | 0.210639              | -1.3764844         | -1.6861945                | -0.6705634            |
| 8124196     | 4.00E-04    |                           | DCDC2       | doublecortin domain containing 2                                           | 0.334460432 | down       | 857.3874       | 792.68994      | 265.44412   | 161.98586          | 271.14767      | 1.196223955       | 0.074899994           | -0.020195326          | -1.6002879         | -2.3117795                | -1.570478             |
| 8166202     | 0.001153202 |                           | GRPR        | gastrin-releasing peptide receptor                                         | 0.340194281 | down       | 741.2373       | 768.09766      | 259.56683   | 222.08374          | 330.14737      | 1.073708589       | -0.11166731           | -0.057833355          | -1.6134025         | -1.8325726                | -1.2959329            |
| 8104901     | 6.56E-04    |                           | IL7R        | interleukin 7 receptor                                                     | 0.356825996 | down       | 1748.4443      | 1956.8971      | 702.87775   | 630.3565           | 1271.3392      | 1.037831045       | -0.17065716           | -0.006726265          | -1.4934336         | -1.6436697                | -0.627697             |
| 8026490     | 0.006938173 |                           | UCA1        | urothelial cancer associated 1 (non-protein coding)                        | 0.371830425 | down       | 4364.5054      | 4598.2476      | 1695.2328   | 1796.1136          | 2975.9255      | 0.965249643       | -0.17290528           | -0.09010538           | -1.5173887         | -1.4440979                | -0.7217315            |
| 8116921     | 2.74E-05    |                           | EDN1        | endothelin 1                                                               | 0.374555431 | down       | 257.76572      | 309.24063      | 115.63662   | 112.28369          | 150.8304       | 1.017318495       | -0.2831904            | -0.01912562           | -1.4358745         | -1.4825116                | -1.0533228            |
| 8129677     | 2.07E-04    |                           | SGK1        | serum/glucocorticoid regulated kinase 1                                    | 0.37799282  | down       | 349.3486       | 385.70908      | 145.50795   | 196.48016          | 343.84854      | 0.787793629       | -0.17577522           | -0.037582397          | -1.4411516         | -1.0102504                | -0.198191             |
| 8030002     | 0.004676017 |                           | ZNF114      | zinc finger protein 114                                                    | 0.385395663 | down       | 1367.4473      | 1459.849       | 555.9694    | 670.7215           | 799.2166       | 0.873044928       | -0.082429886          | 0.03085041            | -1.3447374         | -1.0940889                | -0.82495755           |
| 7927827     | 0.00803814  |                           | MYPN        | myopalladin                                                                | 0.388216044 | down       | 473.0692       | 514.3276       | 194.16711   | 219.7082           | 346.13748      | 0.920224404       | 0.011569659           | 0.1054306             | -1.2596377         | -1.0797534                | -0.4250803            |
| 7917875     | 7.07E-04    |                           | F3          | coagulation factor III (thromboplastin, tissue factor)                     | 0.39424671  | down       | 1128.3658      | 1218.4924      | 484.61035   | 413.2101           | 943.63385      | 1.097291179       | -0.13422581           | -0.016422272          | -1.3592516         | -1.577437                 | -0.38473096           |
| 7957140     | 0.026575293 |                           | LGR5        | leucine-rich repeat-containing G protein-coupled receptor 5                | 0.41232594  | down       | 1140.3478      | 1191.4098      | 483.42637   | 407.03723          | 492.85278      | 1.10791244        | -0.32850328           | -0.28792635           | -1.5660692         | -1.8045807                | -1.5310709            |
| 8172266     | 0.001339399 |                           | MIR221      | microRNA 221                                                               | 0.414736586 | down       | 103.45541      | 157.4239       | 65.03158    | 79.84388           | 112.838036     | 0.839358915       | -0.49713288           | 0.11575731            | -1.1539755         | -0.86160994               | -0.3640717            |
| 7931108     | 0.004173048 |                           | DMBT1       | deleted in malignant brain tumors 1                                        | 0.428247111 | down       | 273.21982      | 268.3616       | 113.20209   | 136.26653          | 227.5124       | 0.851350136       | -0.059259575          | -0.078999996          | -1.3024846         | -1.0348929                | -0.29715952           |
| 7922408     | 0.024416802 |                           | SNORD78     | small nucleolar RNA, C/D box 78                                            | 0.433920522 | down       | 716.56525      | 981.90814      | 437.34872   | 597.8467           | 815.65576      | 0.705270033       | -0.70518905           | -0.17376582           | -1.3782631         | -0.92754143               | -0.4915603            |
| 8178435     | 0.01854504  |                           | IER3        | immediate early response 3                                                 | 0.435939326 | down       | 1706.7183      | 2088.2888      | 880.955     | 960.06036          | 2323.9392      | 0.934479296       | -0.50693417           | -0.2593759            | -1.4571766         | -1.3325319                | -0.06593641           |
| 8124848     | 0.01894931  |                           | IER3        | immediate early response 3                                                 | 0.437451634 | down       | 1474.2894      | 1849.911       | 780.84283   | 849.3582           | 2056.665       | 0.935911131       | -0.5597636            | -0.27805838           | -1.470863          | -1.3507309                | -0.08791714           |
| 8179704     | 0.01887926  |                           | IER3        | immediate early response 3                                                 | 0.437691047 | down       | 1473.0494      | 1849.291       | 780.9072    | 849.0822           | 2049.5693      | 0.936188662       | -0.5608406            | -0.27839026           | -1.4704056         | -1.35107                  | -0.092497826          |
| 7982377     | 0.003181419 |                           | GREM1       | gremlin 1                                                                  | 0.440777073 | down       | 1396.089       | 1442.4219      | 634.2016    | 727.55414          | 1048.3174      | 0.88449617        | -0.12292608           | -0.059360504          | -1.2412373         | -1.0473105                | -0.5156314            |
| 8107100     | 4.93E-04    |                           | RGMB        | RGM domain family, member B                                                | 0.445285876 | down       | 1161.4741      | 1288.8168      | 571.5798    | 568.5589           | 717.4449       | 1.004211857       | -0.20414543           | -0.04851055           | -1.2157068         | -1.2298965                | -0.886544             |
| 8098214     | 0.001076845 |                           | TLL1        | toll-like 1                                                                | 0.44700369  | down       | 617.0971       | 600.6096       | 266.3579    | 228.25236          | 310.12         | 1.114002831       | 0.102425575           | 0.062007587           | -1.0996338         | -1.3226457                | -0.8864425            |
| 8150537     | 0.001323739 |                           | SLC20A2     | solute carrier family 20 (phosphate transporter), member 2                 | 0.45568695  | down       | 729.396        | 753.60895      | 341.2662    | 361.7087           | 553.25195      | 0.950423525       | -0.12097231           | -0.0676864            | -1.2015715         | -1.1159967                | -0.5038217            |
| 8131803     | 0.016932905 |                           | IL6         | interleukin 6 (interferon, beta 2)                                         | 0.458081385 | down       | 139.14098      | 346.5399       | 154.106     | 153.05107          | 274.59473      | 1.005482038       | -1.47652              | -0.18870623           | -1.3150305         | -1.3232375                | -0.48676586           |
| 7922416     | 0.02741842  |                           | SNORD75     | small nucleolar RNA, C/D box 75                                            | 0.462998824 | down       | 615.6204       | 830.2568       | 380.30087   | 563.1294           | 693.7671       | 0.959367485       | -0.5408618            | -0.10278543           | -1.2137051         | -0.35086918               | -0.06593641           |
| 8122265     | 4.59E-04    |                           | TNF-IP3     | tumor necrosis factor, alpha-induced protein 3                             | 0.465884664 | down       | 280.41983      | 425.02457      | 197.28053   | 270.99976          | 489.035        | 0.676306655       | -0.5838488            | 0.075600944           | -1.0263543         | -0.56805867               | 0.2836237             |
| 8121257     | 6.80E-04    |                           | PRDM1       | PR domain containing 1, with ZNF domain                                    | 0.475909372 | down       | 191.91118      | 207.01685      | 98.351875   | 96.16751           | 134.34299      | 1.020101831       | -0.19519424           | -0.08888308           | -1.1601243         | -1.1894597                | -0.710676             |
| 7991335     | 0.002480197 |                           | ANPEP       | alanyl (membrane) aminopeptidase                                           | 0.484859416 | down       | 381.53867      | 468.3064       | 225.92558   | 212.13942          | 263.27838      | 1.056878098       | -0.26745415           | 0.044560432           | -0.99980116        | -1.091623                 | -0.77440006           |
| 8109044     | 0.008307722 |                           | SPINK6      | serine peptidase inhibitor, Kazal type 6                                   | 0.486275533 | down       | 289.058        | 280.32217      | 134.44035   | 159.55878          | 222.22493      | 0.827816585       | -0.035727818          | -0.10530933           | -1.1545635         | -0.8968312                | -0.41751322           |
| 7922410     | 0.027771054 |                           | SNORD44     | small nucleolar RNA, C/D box 44                                            | 0.487291724 | down       | 563.1214       | 741.8693       | 374.7234    | 533.29865          | 671.55945      | 0.68086556        | -0.52335764           | -0.066563606          | -1.103706          | -0.66592922               | -0.5125322            |
| 7952335     | 0.02110739  |                           | SNORD14E    | small nucleolar RNA, C/D box 14E                                           | 0.487425305 | down       | 177.37115      | 217.07579      | 108.297935  | 162.8548           | 225.97215      | 0.498456143       | -0.29724216           | 0.03882583            | -0.99792117        | -0.36867157               | 0.071745396           |
| 8023575     | 6.97E-05    |                           | CCBE1       | collagen and calcium binding EGF domains 1                                 | 0.489109488 | down       | 1334.4438      | 1454.0118      | 710.42413   | 474.44974          | 618.247        | 1.317345754       | -0.07824961           | 0.047288578           | -0.9844821         | -1.5679289                | -1.1865155            |
| 8079407     | 0.02648811  |                           | CCRL2       | chemokine (C-C motif) receptor-like 2                                      | 0.490016958 | down       | 111.2608       | 116.2006       | 54.570637   | 56.327652          | 65.46182       | 0.971490896       | 0.16685946            | 0.20278406            | -0.82631236        | -0.96070835               | -0.59708045           |
| 7952339     | 0.00518261  |                           | SNORD14C    | small nucleolar RNA, C/D box 14C                                           | 0.491905087 | down       | 1350.4355      | 1748.2006      | 855.21063   | 1125.5211          | 1428.8639      | 0.697297306       | -0.29456425           | 0.0909853             | -0.9325628         | -0.5371726                | -0.20136833           |
| 7936968     | 0.00908412  |                           | ADAM12      | ADAM metalloproteinase domain 12                                           | 0.493150144 | down       | 570.29004      | 594.3409       | 294.17563   | 238.46997          | 271.9992       | 1.185583295       | 0.027535439           | 0.0953118             | -0.92458934        | -1.2213773                | -1.0291162            |
| 8117189     | 0.02957003  |                           | DCDC2       | doublecortin domain containing 2 /// kidney associated antigen 1           | 0.502563366 | down       | 211.17659      | 213.08443      | 102.48411   | 95.01541           | 106.7502678    | 0.8466173         | -0.11151632           | -0.14235528           | -1.161048          | -0.63304186               | -0.5156314            |
| 8057803     | 2.21E-04    |                           | TMEFF2      | transmembrane protein with EGF-like and two follistatin-like domains 2     | 0.49439321  | down       | 1285.8895      | 1223.174       | 603.71826   | 524.0667           | 702.4448       | 1.128583133       | 0.11176459            | 0.04662927            | -0.9696398         | -1.1747316                | -0.75800556           |
| 8136248     | 2.48E-04    |                           | MEST        | mesoderm specific transcript homolog (mouse)                               | 0.497507834 | down       | 2348.255       | 2397.6936      | 1192.6979   | 1269.723           | 2118.1052      | 0.936078527       | -0.04447524           | -0.013904889          | -1.0211138         | -0.93070346               | -0.19054508           |
| 8081341     | 0.011563786 |                           | FAM172B     | family with sequence similarity 172, member B pseudogene                   | 0.497895396 | down       | 335.58542      | 305.1122       | 148.95996   | 162.69981          | 204.07649      | 0.912009908       | 0.10292848            | 0.004771868           | -1.0013136         | -0.872711                 | -0.55631447           |
| 8058273     | 0.045401264 |                           | MPPI4       | membrane protein, palmitoylated 4 (MAGUK p55 subfamily member 4)           | 0.500935096 | down       | 224.82623      | 208.48872      | 99.4446     | 77.45197           | 89.00469       | 1.20186511        | -0.22011025           | -0.3319459            | -1.3292503         | -1.6982913                | -1.511541             |
| 8013323     | 0.002845216 |                           | SNORD3A     | small nucleolar RNA, C/D box 3A                                            | 0.50402582  | down       | 810.34564      | 829.8828       | 416.96732   | 491.78098          | 679.6902       | 0.818816044       | -0.15099971           | -0.106115494          | -1.0945463         | -0.65155675               | -0.39078045           |
| 7934979     | 0.006890329 |                           | ANKRD1      | ankyrin repeat domain 1 (cardiac muscle)                                   | 0.504086503 | down       | 2416.794       | 2424.3713      | 1201.4464   | 873.0579           | 1541.7865      | 1.268527119       | -0.06829866           | -0.061435383          | -1.0496922         | -1.5133404                | -0.7052021            |
| 8013325     | 0.002844837 |                           | SNORD3A     | small nucleolar RNA, C/D box 3A                                            | 0.504154485 | down       | 810.44916      | 829.7011       | 416.9829    | 491.83835          | 679.7805       | 0.818628183       | -0.150376             | -0.10602156           | -1.0940838         | -0.8525899                | -0.39017233           |
| 8013329     | 0.002853846 |                           | SNORD3A     | small nucleolar RNA, C/D box 3A                                            | 0.504190555 | down       | 810.69385      | 830.1025       | 417.2233    | 492.18442          | 680.0244       | 0.818442973       | -0.1500705            | -0.105361305          | -1.0933203         | -0.8516159                | -0.38971773           |

|         |             |           |                                                                                               |              |       |            |           |           |           |             |             |              |              |             |             |              |
|---------|-------------|-----------|-----------------------------------------------------------------------------------------------|--------------|-------|------------|-----------|-----------|-----------|-------------|-------------|--------------|--------------|-------------|-------------|--------------|
| 8005547 | 0.00282709  | SNORD3A   | small nucleolar RNA, C/D box 3A                                                               | 0.504571137  | down  | 810.68414  | 829.8784  | 417.38794 | 491.90793 | 679.842     | 0.819341301 | -0.15001361  | -0.10583464  | -1.0927051  | -0.8525165  | -0.39016595  |
| 8005553 | 0.002815761 | SNORD3A   | small nucleolar RNA, C/D box 3A                                                               | 0.505194894  | down  | 811.2129   | 830.4406  | 418.2028  | 492.50537 | 680.316     | 0.819757989 | -0.14884059  | -0.10444037  | -1.0895284  | -0.85040665 | -0.38883877  |
| 8068593 | 0.006424058 | ETS2      | v-cs erythroblastosis virus E26 oncogene homolog 2 (avian)                                    | 0.506170087  | down  | 1047.5223  | 1266.6337 | 631.59174 | 643.2745  | 912.66974   | 0.98163168  | -0.3723558   | -0.094213806 | -1.0765196  | -1.07326    | -0.55833596  |
| 8140668 | 0.01206584  | SEMA3A    | sema domain, immunoglobulin domain (Ig), short basic domain, secreted, (semaphorin) 3A        | 0.506631913  | down  | 446.10672  | 483.82773 | 246.5028  | 148.46509 | 197.91225   | 1.41304865  | 0.015639624  | 0.12322469   | -0.8577652  | -1.0160262  | -0.1614626   |
| 8096050 | 0.006982318 | FGF5      | fibroblast growth factor 5                                                                    | 0.510958945  | down  | 1905.0526  | 1809.0005 | 912.7779  | 928.9057  | 1511.3389   | 0.98204604  | 0.22036393   | 0.14231474   | -0.82649004 | -0.80019474 | -0.10482534  |
| 8004416 | 0.027519878 | FGF11     | fibroblast growth factor 11                                                                   | 0.510119157  | down  | 1136.0162  | 1091.5507 | 566.7259  | 552.45123 | 742.55975   | 1.027198924 | 0.21257496   | 0.15693538   | -0.8116153  | -0.82366943 | -0.39752898  |
| 8077441 | 0.012197754 | BHLHE40   | basic helix-loop-helix family, member e40                                                     | 0.516682836  | down  | 1537.2157  | 1545.0082 | 797.2336  | 907.9355  | 1703.0522   | 0.831598197 | 0.12868755   | 0.14553006   | -0.8071191  | -0.62362024 | -0.29642668  |
| 8015210 | 0.01762685  | KRTAP2-4  | keratin associated protein 2-4                                                                | 0.516940395  | down  | 1872.4147  | 1760.6198 | 886.9629  | 676.6735  | 929.4619    | 1.240200711 | -0.04581483  | -0.13893826  | -1.09068484 | -1.4849268  | -1.0321249   |
| 8057797 | 0.006151477 | SDPR      | serum deprivation response                                                                    | 0.517501486  | serum | 1739.6334  | 1421.8926 | 734.9427  | 615.2945  | 1727.9357   | 1.174173109 | 0.36512598   | 0.082235016  | -0.86813    | -1.1311888  | -0.2024266   |
| 8159006 | 0.003775276 | SNORD36B  | small nucleolar RNA, C/D box 36B                                                              | 0.518084732  | down  | 552.83185  | 774.7259  | 403.4441  | 534.48804 | 561.9586    | 0.647049923 | -0.41045284  | 0.07603836   | -0.87270164 | -0.46031666 | -0.38519382  |
| 8019576 | 0.01695586  | KRTAP2-4  | keratin associated protein 2-4                                                                | 0.519197591  | down  | 1873.2318  | 1748.9916 | 885.8638  | 676.37213 | 928.7198    | 1.242712226 | -0.04446972  | -0.1459589   | -1.0916033  | -1.484499   | -1.0322924   |
| 7977270 | 0.041151263 | LOC388022 | hypothetical LOC388022                                                                        | 0.51957515   | down  | 951.5258   | 1102.7618 | 558.3599  | 484.54407 | 558.16064   | 1.135590691 | -0.18726604  | 0.044112206  | -0.9004834  | -1.1048161  | -0.88650733  |
| 8069676 | 0.010518756 | ADAMTS1   | ADAM metalloproteinase with thrombospondin type 1 motif, 1                                    | 0.52150885   | down  | 970.5992   | 981.84686 | 506.2478  | 496.1674  | 745.70557   | 1.021195164 | -0.096580505 | -0.085408844 | -1.0246452  | -1.0559906  | -0.463411    |
| 8093304 | 0.034125008 | CCRL2     | chemokine (C-C motif) receptor-like 2                                                         | 0.524721244  | down  | 107.206764 | 110.88019 | 55.81115  | 57.19183  | 97.9492758  | 0.21343453  | 0.23321454   | -0.69716233  | -0.6623642  | -0.4351778  | -0.6498809   |
| 7930498 | 0.004632095 | ACSL5     | acyl-CoA synthetase long-chain family member 5                                                | 0.5278222584 | down  | 312.59515  | 364.22678 | 192.81429 | 181.58478 | 242.07153   | 1.065511621 | -0.29387394  | -0.06728268  | -0.9891577  | -0.5605781  | -0.4698809   |
| 8053735 | 0.012963627 | LOC642838 | ---                                                                                           | 0.528149887  | down  | 324.38696  | 358.61575 | 190.53288 | 226.55278 | 266.95712   | 0.785701541 | -0.14352655  | 0.032589956  | -0.888391   | -0.6212959  | -0.38957533  |
| 8152215 | 0.012675474 | KLF10     | Kruppel-like factor 10                                                                        | 0.528562905  | down  | 618.65326  | 618.60443 | 328.0775  | 376.77344 | 631.71796   | 0.832387517 | -0.0664072   | -0.06341362  | -0.98326653 | -0.07272195 | -0.032743454 |
| 8114572 | 9.10E-04    | HBEGF     | heparin-binding EGF-like growth factor                                                        | 0.528587492  | down  | 1289.3219  | 1420.5739 | 748.2163  | 1037.1857 | 1422.2365   | 0.570214719 | -0.09364446  | 0.06023534   | -0.8595505  | -0.3900229  | 0.06794453   |
| 8115083 | 0.016926503 | CA9       | carbonic anhydrase IX                                                                         | 0.52864866   | down  | 2237.0488  | 2433.9978 | 1289.0945 | 1817.98   | 2936.4863   | 0.53805223  | 0.032129925  | 0.15056355   | -0.76905537 | -0.27791753 | 0.43701777   |
| 8140650 | 9.31E-04    | SEMA3E    | sema domain, immunoglobulin domain (Ig), short basic domain, secreted, (semaphorin) 3E        | 0.529798995  | down  | 1910.5853  | 1847.6442 | 981.09814 | 762.4155  | 918.56836   | 1.252361242 | 0.077124275  | 0.030425072  | -0.88605785 | -1.2578789  | -0.97583455  |
| 7954065 | 0.008967388 | GPRC5A    | G protein-coupled receptor, family C, group 5, member A                                       | 0.530719955  | down  | 5415.0854  | 6017.5845 | 3213.7148 | 3484.8496 | 4935.184    | 0.903299786 | -0.082829796 | 0.070412636  | -0.8435647  | -0.7198677  | -0.21058305  |
| 8140534 | 0.004318803 | SEMA3C    | sema domain, immunoglobulin domain (Ig), short basic domain, secreted, (semaphorin) 3C        | 0.531982891  | down  | 1040.689   | 1157.4467 | 622.152   | 458.20438 | 575.81445   | 1.30627544  | -0.1199871   | 0.032942455  | -0.87760574 | -1.3150333  | -0.9759242   |
| 7950810 | 0.004693448 | SYTL2     | synaptotagmin-like 2                                                                          | 0.534096251  | down  | 289.01245  | 273.14795 | 145.48433 | 165.16423 | 206.42802   | 0.845845668 | 0.009159247  | -0.07277408  | -0.9791055  | -0.4688498  | -0.4688498   |
| 7952313 | 0.02200246  | MIRLET7A2 | microRNA let-7a-2                                                                             | 0.534578862  | down  | 71.298065  | 90.78225  | 47.185688 | 45.571625 | 62.7263     | 1.037022713 | -0.40360895  | -0.08256706  | -0.98609304 | -0.10445625 | -0.6021864   |
| 7948900 | 0.047873084 | SNORD30   | small nucleolar RNA, C/D box 30                                                               | 0.536226669  | down  | 1062.866   | 1342.9734 | 744.13226 | 1131.3563 | 1558.4254   | 0.53377692  | -0.41125965  | 0.024189014  | -0.87489575 | -0.26690134 | 0.17439683   |
| 8046408 | 0.021873519 | PDK1      | pyruvate dehydrogenase kinase, isozyme 1                                                      | 0.53649525   | down  | 1335.4114  | 1308.2377 | 710.2864  | 1004.3118 | 1281.9856   | 0.508278684 | 0.12795322   | 0.10538801   | -0.79297477 | -0.27624702 | 0.08271917   |
| 7909271 | 0.020500363 | IL24      | interleukin 24                                                                                | 0.541150432  | down  | 289.6346   | 286.59207 | 152.93205 | 170.86931 | 283.82104   | 0.865799362 | -0.16265106  | -0.16993856  | -1.055837   | -0.9016511  | -0.17307647  |
| 8089112 | 1.08E-04    | FILIP1L   | filamin A interacting protein 1-like                                                          | 0.541229892  | down  | 423.71024  | 441.6539  | 238.83801 | 212.19409 | 290.01      | 1.131369983 | -0.06981124  | -0.00948752  | -0.8951737  | -1.0652588  | -0.62052566  |
| 8023497 | 0.001651762 | ATP8B1    | ATPase, aminophospholipid transporter, class I, type 8B, member 1                             | 0.541501515  | down  | 1743.3223  | 1752.2147 | 943.55194 | 766.34125 | 1128.3184   | 1.219140412 | 0.09444078   | 0.100609146  | -0.78435355 | -1.0855879  | -0.5272725   |
| 8135734 | 0.018630177 | Ctorf58   | chromosome 7 open reading frame 58                                                            | 0.542750975  | down  | 445.04385  | 414.42285 | 219.90181 | 138.12477 | 148.83636   | 1.42040203  | 0.048095703  | -0.079315186 | -0.96095294 | -1.6308423  | -1.5488619   |
| 7957126 | 0.006106191 | KCNMB4    | potassium large conductance calcium-activated channel, subfamily M, beta member 4             | 0.546528185  | down  | 578.618    | 601.63336 | 326.3689  | 375.88882 | 424.7438    | 0.820100568 | -0.167680836 | -0.10176531  | -0.97397355 | -0.76794976 | -0.59142274  |
| 7948896 | 0.044800706 | SNORD22   | small nucleolar RNA, C/D box 22                                                               | 0.54666315   | down  | 486.6312   | 685.1773  | 389.4348  | 547.95264 | 647.78394   | 0.646040073 | -0.58987397  | -0.04042403  | -0.91170484 | -0.36773586 | -0.15832679  |
| 8122396 | 0.021659933 | AIG1      | androgen-induced 1                                                                            | 0.550712589  | down  | 578.8943   | 565.8666  | 306.21582 | 296.91663 | 303.06137   | 1.003814495 | -0.11113802  | -0.14227454  | -0.10258137 | -1.0260702  | -0.10260702  |
| 7938331 | 0.004046904 | ZNF143    | zinc finger protein 143                                                                       | 0.551967765  | down  | 812.99805  | 762.4085  | 424.07864 | 506.3195  | 503.42856   | 0.756921071 | 0.04927508   | -0.03579553  | -0.89313954 | -0.6340682  | -0.6477521   |
| 7948332 | 0.037596278 | LPXN      | leupaxin                                                                                      | 0.55893297   | down  | 1123.1743  | 1240.499  | 678.24805 | 799.96484 | 998.3733    | 0.783518747 | -0.42250443  | -0.24838574  | -1.0876385  | -0.88441277 | -0.55062866  |
| 8081235 | 3.22E-04    | COL8A1    | collagen, type VIII, alpha 1                                                                  | 0.561018535  | down  | 278.6573   | 281.25302 | 157.85127 | 127.94802 | 1.242512485 | 0.00386111  | 0.018667221  | -0.8152113   | -1.1296262  | -0.5929263  | -0.1029263   |
| 7948902 | 0.005523933 | SNORD29   | small nucleolar RNA, C/D box 29                                                               | 0.561749057  | down  | 1252.5297  | 1530.7916 | 860.8327  | 1446.8434 | 1682.1035   | 0.125303507 | -0.30505815  | 0.007483482  | -0.82451886 | -0.06938998 | 0.12068367   |
| 8086517 | 0.020154886 | CDCP1     | CUB domain containing protein 1                                                               | 0.56203804   | down  | 567.37286  | 588.424   | 322.97458 | 306.02682 | 471.2286    | 1.063845534 | 0.09568628   | 0.19788997   | -0.6333704  | -0.71641606 | -0.094620705 |
| 8029489 | 0.010590332 | BCAM      | basal cell adhesion molecule (Lutheran blood group)                                           | 0.564996713  | down  | 434.04135  | 490.60352 | 277.62723 | 330.04578 | 513.7832    | 0.753876124 | -0.28676763  | -0.11731783  | -0.9410035  | -0.6890208  | -0.04896577  |
| 7983930 | 0.006285104 | ADM       | adrenomedullin                                                                                | 0.567837954  | down  | 453.8524   | 525.91046 | 295.79016 | 365.15015 | 541.64856   | 0.608592475 | -0.2582563   | -0.05372302  | -0.87017184 | -0.57136375 | 5.12E-04     |
| 7922404 | 0.046409107 | SNORD80   | small nucleolar RNA, C/D box 80                                                               | 0.569402248  | down  | 419.56104  | 541.4001  | 310.117   | 464.8481  | 519.14014   | 0.3390883   | -0.3835783   | -0.03497982  | -0.8474598  | -0.23908649 | -0.10152499  |
| 7912157 | 0.0208033   | ERRF1     | ERBB receptor feedback inhibitor 1                                                            | 0.570751171  | down  | 1040.4369  | 1100.835  | 629.6761  | 795.8929  | 1120.93     | 0.647217107 | -0.12337303  | -0.04261907  | -0.8516852  | -0.50355786 | -0.005636215 |
| 8148553 | 0.007190814 | LY6K      | lymphocyte antigen 6 complex, locus K                                                         | 0.57120988   | down  | 1369.4391  | 1307.546  | 738.1595  | 771.2399  | 947.7498    | 0.941901678 | -0.070578255 | -0.12964752  | -0.93755436 | -0.8903268  | -0.5896943   |
| 7914342 | 0.03600214  | FABP3     | fatty acid binding protein 3, muscle and heart (mammary-derived growth inhibitor)             | 0.572212175  | down  | 659.0127   | 638.51855 | 359.15756 | 201.39526 | 379.00174   | 1.56472559  | 0.10301876   | 0.03714466   | -0.7682333  | -1.59200474 | -0.69216347  |
| 7958960 | 0.026311824 | TPCN1     | two pore segment channel 1                                                                    | 0.573019437  | down  | 943.57886  | 1049.2587 | 587.60956 | 465.4668  | 510.6813    | 1.2645792   | 0.04046504   | 0.1852274    | -0.6181167  | -0.96149606 | -0.8222693   |
| 8164200 | 0.01462088  | ANGPTL2   | angiopoietin-like 2                                                                           | 0.573836554  | down  | 926.8382   | 963.2783  | 552.62665 | 653.9033  | 828.6294    | 0.753375763 | -0.123929344 | -0.07748953  | -0.8778778  | -0.64108914 | -0.3013455   |
| 8135069 | 0.006763263 | SERPINE1  | serpin peptidase inhibitor, clade E (nexin, plasminogen activator inhibitor type 1), member 1 | 0.573897215  | down  | 1688.5084  | 1893.5746 | 1091.9702 | 933.03546 | 1589.2982   | 1.198270793 | -0.09178257  | 0.07461516   | -0.72652054 | -0.97778636 | -0.17624448  |
| 7902687 | 0.00105719  | CYR61     | cysteine-rich, angiogenic inducer, 61                                                         | 0.574192307  | down  | 3191.2102  | 3555.2454 | 2034.5303 | 1935.9186 | 3078.005    | 1.064845611 | -0.1876262   | -0.03418668  | -0.8345807  | -0.9059207  | -0.23954837  |
| 8122365 | 9.63E-04    | GPR126    | G protein-coupled receptor 126                                                                | 0.576953545  | down  | 3255.5002  | 3394.2551 | 1955.8685 | 1711.9575 | 2274.32     | 1.169572631 | -0.1339318   | -0.07432874  | -0.86780167 | -1.059606   | -0.06950246  |
| 8086961 | 0.01696267  | PFKFB4    | 6-phosphofructo-2-kinase/fructose-2,6-bisphosphatase 4                                        | 0.57716613   | down  | 523.4965   | 548.37933 | 311.2156  | 415.02844 | 603.13336   | 0.56227354  | 0.054739315  | 0.109812416  | -0.683129   | -0.2716592  | 0.27164236   |
| 7930413 | 0.00792718  | DUSP5     | dual specificity phosphatase 5                                                                | 0.57874031   | down  | 731.10724  | 777.79034 | 448.7023  | 514.44525 | 937.72504   | 0.800226863 | -0.01781845  | 0.077947296  | -0.71106464 | -0.5174224  | 0.34741402   |
| 8095110 | 0.010544828 | KIT       | v-kit Hardy-Zuckerman 4 feline sarcoma viral oncogene homolog                                 | 0.578880986  | down  | 851.10254  | 820.33936 | 469.07516 | 467.4237  | 547.38245   | 1.004701475 | 0.1708641    | 0.103894536  | -0.68476677 | -0.4691226  | -0.4869436   |
| 7954344 | 0.002379303 | LST       |                                                                                               |              |       |            |           |           |           |             |             |              |              |             |             |              |

|         |             |             |                                                                                  |             |      |           |           |           |           |           |              |              |              |             |             |              |
|---------|-------------|-------------|----------------------------------------------------------------------------------|-------------|------|-----------|-----------|-----------|-----------|-----------|--------------|--------------|--------------|-------------|-------------|--------------|
| 8175666 | 0.015470676 | GABRE       | gamma-aminobutyric acid (GABA) A receptor, epsilon                               | 0.593153654 | down | 268.15494 | 362.5793  | 214.17424 | 214.95808 | 285.45966 | 0.994718239  | -0.5379793   | -0.07825247  | -0.8317747  | -0.8254735  | -0.4162334   |
| 8157216 | 0.005775005 | UGCG        | UDP-glucose ceramide glucosyltransferase                                         | 0.594124501 | down | 1801.9166 | 1969.1754 | 1168.6113 | 1052.0924 | 1440.6312 | 1.145545997  | -0.0454216   | 0.07769998   | -0.67346287 | -0.8231182  | -0.370718    |
| 8039484 | 0.022905499 | IL1I        | interleukin 11                                                                   | 0.59461619  | down | 324.78137 | 314.40073 | 184.84926 | 221.92548 | 370.52066 | 0.713810889  | 0.20683384   | 0.16981728   | -0.58015203 | -0.31302542 | 0.41028096   |
| 8091411 | 0.028674599 | TM4SF1      | transmembrane 4 L six family member 1                                            | 0.596073414 | down | 3143.5176 | 2936.2961 | 1751.0028 | 2458.6865 | 2876.0613 | 0.0402946342 | 0.23542245   | 0.13292068   | -0.61351746 | -0.1140656  | 0.17100666   |
| 8142975 | 0.00317935  | MIR29A      | microRNA 29a                                                                     | 0.596359322 | down | 38.086674 | 52.655437 | 31.402002 | 32.5679   | 40.251102 | 0.945143079  | -0.54031485  | -0.04311053  | -0.7888568  | -0.74307346 | -0.4272081   |
| 7965335 | 0.007137872 | DUSP6       | dual specificity phosphatase 6                                                   | 0.597546224 | down | 395.8148  | 371.2991  | 219.92201 | 300.4321  | 587.8361  | 0.46814878   | 0.13102691   | 0.044286728  | -0.69859105 | -0.27094015 | 0.6999178    |
| 8150509 | 0.029370645 | PLAT        | plasminogen activator, tissue                                                    | 0.598056186 | down | 3176.1614 | 3517.9941 | 2077.7217 | 1654.484  | 2300.3816 | 1.293859481  | -0.059979755 | -0.66629124  | -0.99858464 | -0.52153873 | -0.06629124  |
| 7927631 | 0.002024163 | DKK1        | k Dickkopf homolog 1 (Xenopus laevis)                                            | 0.59916979  | down | 5488.148  | 5683.61   | 3412.7004 | 3204.569  | 4821.6597 | 1.170914509  | -0.07881864  | -0.030226389 | -0.76918954 | -0.942241   | -0.2661282   |
| 8161580 | 0.037926808 | LOC10132426 | ---                                                                              | 0.599624815 | down | 312.10394 | 324.22794 | 194.08154 | 229.83478 | 256.37845 | 0.725284449  | -0.043962795 | 0.03283723   | -0.70503074 | -0.44486937 | -0.29173756  |
| 7952577 | 0.003451568 | KIRREL3     | kin of IRRE like 3 (Drosophila)                                                  | 0.601223924 | down | 564.1985  | 643.86523 | 385.90283 | 302.59732 | 371.3938  | 1.322936637  | -0.15723579  | 0.03161335   | -0.7024123  | -1.0609833  | -0.7627166   |
| 7924450 | 5.61E-04    | DUSP10      | dual specificity phosphatase 10                                                  | 0.601414768 | down | 331.09866 | 353.03116 | 212.22156 | 280.01205 | 318.16354 | 0.518566277  | -0.10400677  | -0.011176109 | -0.7447438  | -0.3523682  | -0.16554801  |
| 8161563 | 0.041482523 | AQP7        | ---                                                                              | 0.603836402 | down | 312.91522 | 325.11362 | 196.27684 | 229.47581 | 256.55618 | 0.742317605  | -0.04475546  | 0.034502346  | -0.6932681  | -0.449845   | -0.29357228  |
| 8038949 | 0.024700608 | ZNF841      | zinc finger protein 841                                                          | 0.60395095  | down | 621.3122  | 701.0173  | 417.38962 | 473.014   | 497.2748  | 0.8038824    | -0.08385531  | 0.07567152   | -0.65182525 | -0.47577858 | -0.40169176  |
| 8162940 | 0.016836245 | ABCA1       | ATP-binding cassette, sub-family A (ABC1), member 1                              | 0.604498655 | down | 190.45872 | 193.34021 | 115.12765 | 132.14034 | 154.65564 | 0.782481356  | -0.16081016  | -0.10155264  | -0.8277416  | -0.63021785 | -0.40334478  |
| 8160431 | 0.005620883 | LOC554202   | hypothetical LOC554202                                                           | 0.605164779 | down | 218.05989 | 200.78131 | 120.74823 | 138.45271 | 211.49077 | 0.778785472  | 0.09350809   | -0.013253212 | -0.7378532  | -0.54339075 | 0.07147074   |
| 8043484 | 0.037097964 | LOC642838   | ---                                                                              | 0.606271    | down | 313.18527 | 324.3837  | 196.29436 | 228.73988 | 258.55887 | 0.746696173  | -0.031728745 | 0.040736515  | -0.6812288  | -0.4459003  | -0.27217755  |
| 8120967 | 0.042635027 | NTSE        | 5'-nucleotidase, ecto (CD73)                                                     | 0.606559676 | down | 2389.8474 | 2501.12   | 1498.274  | 1311.1865 | 1846.9701 | 1.18655656   | 0.01834774   | 0.092170215  | -0.6291078  | -0.82912034 | -0.33262     |
| 8107673 | 0.018621244 | GRAMD3      | GRAM domain containing 3                                                         | 0.60806512  | down | 1212.348  | 1265.4978 | 769.1761  | 833.85205 | 1273.2703 | 0.869809457  | -0.09093698  | -0.020461401 | -0.73816365 | -0.61434394 | -0.010935783 |
| 7982597 | 0.02119457  | THBS1       | thrombospondin 1                                                                 | 0.609465115 | down | 4870.4653 | 5542.1665 | 3404.744  | 3116.0117 | 3786.0918 | 1.135084336  | -0.23625469  | -0.05524667  | -0.7696311  | -0.9001233  | -0.59970635  |
| 8115831 | 0.002361618 | DUSP1       | dual specificity phosphatase 1                                                   | 0.609696169 | down | 1339.707  | 1425.3507 | 864.7388  | 1061.3597 | 1818.1217 | 0.64927448   | -0.120399155 | -0.03785674  | -0.7516944  | -0.4654646  | -0.3180186   |
| 8123936 | 0.001583234 | NEDD9       | neural precursor cell expressed, developmentally down-regulated 9                | 0.610529311 | down | 388.07568 | 368.9524  | 225.15979 | 256.991   | 384.19363 | 0.77863113   | 0.012928963  | -0.055813152 | -0.76768064 | -0.57703906 | 0.006911423  |
| 8019709 | 0.036144167 | RNU2-1      | ---                                                                              | 0.61220656  | down | 4948      | 5719.2476 | 3488.0703 | 3556.2363 | 4919.779  | 0.969448416  | -0.3654251   | -0.1594572   | -0.8673671  | -0.843771   | -0.3804995   |
| 8147344 | 4.36E-04    | PDP1        | pyruvate dehydrogenase phosphatase catalytic subunit 1                           | 0.613579466 | down | 3768.7178 | 3709.1387 | 2279.9219 | 2042.5699 | 3392.7156 | 1.166077673  | 0.038540203  | 0.015441577  | -0.68923634 | -0.11322149 | -0.84556264  |
| 7976567 | 0.014651937 | BDRB1       | bradykinin receptor B1                                                           | 0.613696779 | down | 258.311   | 362.4788  | 219.37517 | 230.59247 | 383.39536 | 0.921614148  | -0.43887725  | 0.030180296  | -0.6742218  | -0.60294026 | 0.12860076   |
| 8056257 | 0.03747134  | FAPK        | fibroblast activation protein, alpha                                             | 0.614901549 | down | 81.46807  | 86.70208  | 52.424976 | 51.82912  | 61.09967  | 1.017383499  | 0.09505526   | 0.19946595   | -0.50210714 | -0.5147886  | -0.29928032  |
| 8164269 | 0.02301013  | ENG         | endoglin                                                                         | 0.615235179 | down | 1363.6178 | 1616.9824 | 987.71173 | 933.80304 | 1245.8604 | 1.085668525  | -0.13640785  | 0.09705067   | -0.60373944 | -0.68325645 | -0.2637364   |
| 8121749 | 0.029845696 | GJA1        | gap junction protein, alpha 1, 43kDa                                             | 0.615548635 | down | 375.6912  | 406.84827 | 247.83923 | 201.65218 | 174.50165 | 1.29048077   | -0.15977955  | -0.039022762 | -0.73907804 | -1.0391213  | -1.2417946   |
| 7969438 | 3.01E-05    | LMO7        | LM domain 7                                                                      | 0.615562655 | down | 1248.026  | 1257.4818 | 774.28534 | 664.2758  | 951.554   | 1.227760418  | -0.010588328 | 0.00300471   | -0.69701767 | -0.9186004  | -0.4017439   |
| 7966026 | 0.001316903 | NUAK1       | NUAK family, SNF1-like kinase, 1                                                 | 0.619680584 | down | 470.18396 | 492.11026 | 304.75977 | 281.47653 | 391.58774 | 1.124273676  | -0.05728213  | 0.031693142  | -0.6587102  | -0.77159244 | -0.29987875  |
| 8118314 | 0.049473792 | HSPA1B      | heat shock 70kDa protein 1B                                                      | 0.619881484 | down | 3955.8132 | 4084.575  | 2525.3633 | 2489.4097 | 2763.1335 | 1.023058832  | -0.15915172  | -0.1104606   | -0.80039626 | -0.8179868  | -0.6703847   |
| 7948898 | 0.03016051  | SNORD31     | small nucleolar RNA, C/D box 31                                                  | 0.62131224  | down | 470.52292 | 579.20087 | 366.4708  | 421.5588  | 520.02405 | 0.741042721  | -0.44026026  | -0.044039358 | -0.73154896 | -0.68923634 | -0.22006543  |
| 8104568 | 0.002261683 | LOC10133299 | GAL11870                                                                         | 0.622567512 | down | 232.79295 | 276.60815 | 171.60303 | 142.08278 | 156.88322 | 1.28113153   | -0.25547585  | -0.002542178 | -0.68624    | -0.9861186  | -0.8226183   |
| 8053602 | 0.018158423 | PLGLB1      | plasminogen-like B1                                                              | 0.62305921  | down | 96.147095 | 105.14822 | 65.32581  | 81.779945 | 84.11411  | 0.586821274  | -0.097178307 | 0.03791396   | -0.6446449  | -0.7317333  | -0.2739888   |
| 7958600 | 0.029822    | ANKRD13A    | ankyrin repeat domain 13A                                                        | 0.623482794 | down | 2194.7812 | 2237.0237 | 1371.7467 | 1551.7037 | 1917.9061 | 0.792023826  | 0.027038893  | 0.049787205  | -0.6317911  | -0.45562917 | -0.14827602  |
| 7932132 | 0.022192795 | FRMD4A      | FERM domain containing 4A                                                        | 0.624490182 | down | 361.98535 | 405.37668 | 249.04857 | 209.21584 | 238.71832 | 1.254802095  | -0.09219676  | 0.059322994  | -0.61992615 | -0.8721897  | -0.68663996  |
| 7921434 | 0.002747816 | AIM2        | absent in melanoma 2                                                             | 0.625136075 | down | 80.93522  | 93.86108  | 58.93121  | 55.58106  | 67.55994  | 1.095910577  | -0.24332666  | -0.025718689 | -0.70347565 | -0.9302641  | -0.407439    |
| 8043367 | 0.018852403 | PLGLB1      | plasminogen-like B1                                                              | 0.626224621 | down | 94.73276  | 103.58286 | 64.71482  | 80.84213  | 83.934395 | 0.585075296  | -0.096143566 | 0.038905304  | -0.6363425  | -0.31219372 | -0.25431824  |
| 7933672 | 0.006504023 | PCDH15      | protocadherin-related 15                                                         | 0.627833412 | down | 472.3918  | 487.24088 | 304.10733 | 173.46846 | 186.09883 | 1.713335051  | -0.08926996  | -0.042018574 | -0.7135649  | -1.523407   | -1.4259537   |
| 8098328 | 0.003183689 | GALNT7      | UDP-N-acetyl-alpha-D-galactosamine:polypeptide N-acetylglucosaminyltransferase 7 | 0.629040722 | down | 1400.4434 | 1365.3981 | 859.137   | 743.5903  | 883.0295  | 1.282323591  | -0.016583124 | -0.053923924 | -0.7226985  | -0.9310916  | -0.6811981   |
| 8112342 | 0.006614429 | ADAMT56     | ADAM metalloproteinase with thrombospondin type 1 motif, 6                       | 0.62989307  | down | 402.09143 | 441.2307  | 276.781   | 220.63612 | 264.07535 | 1.344110656  | -0.23918724  | -0.09541575  | -0.7622366  | -1.0880874  | -0.5298116   |
| 8160260 | 0.009517251 | BNC2        | basonuclin 2                                                                     | 0.631344499 | down | 375.39697 | 397.0118  | 249.3171  | 218.4721  | 260.59885 | 1.208842971  | -0.001149496 | 0.073326744  | -0.5901739  | -0.7798287  | -0.5294118   |
| 8145281 | 0.00963188  | SLC25A37    | solute carrier family 25, member 37                                              | 0.634480326 | down | 974.4124  | 1101.6354 | 694.11743 | 715.16284 | 849.75006 | 0.948357099  | -0.16465442  | 0.011452039  | -0.6449006  | -0.6037753  | -0.354201    |
| 8152703 | 0.008592828 | FBXO32      | F-box protein 32                                                                 | 0.634721917 | down | 247.91124 | 297.0961  | 188.40034 | 183.37547 | 225.99487 | 1.046228758  | -0.3606      | -0.09747251  | -0.7532759  | -0.78986263 | -0.48647484  |
| 8012883 | 0.020409627 | HS3ST3A1    | heparan sulfate (glucosamine) 3-O-sulfotransferase 3A1                           | 0.638398264 | down | 661.71045 | 650.5556  | 411.26956 | 432.2427  | 513.92163 | 0.912351176  | -0.0874602   | -0.10496775  | -0.7524392  | -0.6889878  | -0.44007936  |
| 7941694 | 0.004769899 | RBM14       | RNA binding motif protein 14                                                     | 0.638411469 | down | 1215.6621 | 1324.4819 | 848.85547 | 1019.6914 | 1334.4406 | 0.640819098  | -0.081041336 | 0.042009037  | -0.6054325  | -0.33479372 | 0.054293316  |
| 8083594 | 0.02929325  | PTX3        | pentraxin 3, long                                                                | 0.640499282 | down | 257.5906  | 328.72122 | 207.82695 | 179.22675 | 224.32339 | 1.236572006  | -0.2957295   | 0.0787309    | -0.5640003  | -0.7768666  | -0.45558673  |
| 7953532 | 7.23E-04    | ENO2        | enolase 2 (gamma, neuronal)                                                      | 0.641763134 | down | 2423.3435 | 2473.842  | 1584.2355 | 1868.7535 | 2311.92   | 0.680175448  | -0.00322024  | 0.030428886  | -0.60945827 | -0.37111315 | -0.066316605 |
| 8086022 | 0.006783839 | MIR155      | microRNA 155                                                                     | 0.64191399  | down | 87.727974 | 77.381035 | 49.58256  | 71.866974 | 88.16175  | 1.198358399  | 0.11931753   | -0.06661526  | -0.7061512  | -0.16671865 | -0.1287712   |
| 8105040 | 0.002624022 | OSMR        | oncostatin M receptor                                                            | 0.642259505 | down | 3239.1726 | 3456.721  | 2225.4211 | 2030.2128 | 2722.1638 | 1.158531078  | -0.11962795  | -0.02713426  | -0.66582423 | -0.4023449  | -0.37034068  |
| 8136200 | 0.036489204 | CPA4        | carboxypeptidase A4                                                              | 0.642305971 | down | 3137.9573 | 3288.0293 | 2109.8787 | 1783.014  | 2444.1995 | 1.27743881   | -0.13066673  | -0.057943344 | -0.69661075 | -0.9383898  | -0.47672653  |
| 7965040 | 0.005518349 | PHLDA1      | pleckstrin homology-like domain, family A, member 1                              | 0.642523091 | down | 533.58014 | 528.3749  | 339.53928 | 324.27716 | 538.19244 | 1.080822252  | -0.011616389 | -0.01884007  | -0.65702057 | -0.72368526 | 0.000264659  |
| 8147721 | 0.027266918 | FLJ45248    | protein                                                                          | 0.642543939 | down | 228.5304  | 211.95448 | 137.44225 | 142.0218  | 204.39555 | 0.93853962   | 0.1470248    | 0.034908455  | -0.60322446 | -0.5392373  | -0.01206205  |
| 8147548 | 1.06E-05    | POP1        | processing of precursor 1, ribonuclease PMRP subunit (S. cerevisiae)             | 0.643259028 | down | 218.89183 | 239.52301 | 154.80205 | 154.29497 | 169.1     |              |              |              |             |             |              |

|         |             |          |                                                                                                |             |      |            |            |           |           |             |              |              |              |             |             |              |
|---------|-------------|----------|------------------------------------------------------------------------------------------------|-------------|------|------------|------------|-----------|-----------|-------------|--------------|--------------|--------------|-------------|-------------|--------------|
| 8067409 | 0.016173175 | LAMA5    | laminin, alpha 5                                                                               | 0.649728969 | down | 484.6246   | 519.86053  | 341.20038 | 300.4476  | 386.52896   | 1.228102238  | -0.13171673  | -0.028068542 | -0.6501586  | -0.8216184  | -0.45586967  |
| 7915392 | 0.004830344 | HIVEP3   | human immunodeficiency virus type 1 enhancer binding protein 3                                 | 0.649738636 | down | 299.29446  | 299.2153   | 195.03621 | 187.0293  | 216.63025   | 1.07685717   | 0.0237662    | 0.02272522   | -0.5943436  | -0.64895374 | -0.44627428  |
| 8152222 | 0.041147813 | AZIN1    | antizyme inhibitor 1                                                                           | 0.650490063 | down | 1017.95026 | 947.06396  | 623.95636 | 693.38324 | 1056.6136   | 0.785127679  | 0.11260033   | 0.004339536  | -0.6160615  | -0.44428888 | 0.16452599   |
| 8155864 | 0.0263264   | ROBB     | RAR-related orphan receptor B                                                                  | 0.650699245 | down | 419.44937  | 404.6451   | 259.36612 | 243.95764 | 303.26256   | 1.106061317  | 0.20355415   | 0.1379401    | -0.4819997  | -0.57409525 | -0.25685373  |
| 8005707 | 0.017607983 | MAP2K3   | mitogen-activated protein kinase kinase 3                                                      | 0.651571705 | down | 1052.4768  | 1200.6724  | 780.6473  | 775.0796  | 1129.148    | 1.013255636  | -0.20482826  | -0.007492701 | -0.62549686 | -0.63365716 | -0.088661514 |
| 7988077 | 0.013438887 | LCMT2    | leucine carboxyl methyltransferase 2                                                           | 0.653762699 | down | 723.33     | 697.254    | 452.07242 | 510.8488  | 757.11865   | 0.760273493  | 0.04506272   | -0.009496689 | -0.6226576  | -0.45609665 | 0.11811002   |
| 7921900 | 0.024884325 | SH2D1B   | SH2 domain containing 1B                                                                       | 0.653936913 | down | 177.4207   | 157.72783  | 101.66666 | 101.24347 | 130.61548   | 1.007548719  | 0.1407181    | -0.035339672 | -0.6481163  | -0.6618166  | -0.31569862  |
| 8116910 | 0.009038708 | HIVEP1   | human immunodeficiency virus type 1 enhancer binding protein 1                                 | 0.654993641 | down | 552.19525  | 568.7196   | 371.94446 | 345.21194 | 405.3793    | 1.13583157   | -0.12771957  | -0.07967427  | -0.6901223  | -0.79695066 | -0.5629051   |
| 8132250 | 0.039894045 | BMPEF    | BMP binding endothelial regulator                                                              | 0.656354851 | down | 358.3444   | 383.76038  | 247.9394  | 178.07422 | 191.8289    | 1.514391665  | -0.099230446 | -0.017450333 | -0.63249024 | -1.1049153  | -1.0022802   |
| 8066214 | 0.044211168 | TGM2     | transglutaminase 2 (C polypeptide, protein-glutamine-gamma-glutamyltransferase)                | 0.657144641 | down | 478.92905  | 509.64798  | 331.66306 | 290.11942 | 358.95422   | 1.23341101   | -0.018958092 | 0.10067908   | -0.50503796 | -0.698322   | -0.41660595  |
| 8109149 | 0.002034455 | PCYOX1L  | prenylcysteine oxidase 1 like                                                                  | 0.658754064 | down | 929.53265  | 902.3499   | 593.56323 | 627.33154 | 840.9639    | 0.890641944  | 0.046348255  | 0.008061727  | -0.5941264  | -0.5137612  | -0.091752686 |
| 8122202 | 0.007345939 | MYB      | v-myb myeloblastosis viral oncogene homolog (avian)                                            | 0.659400121 | down | 214.78465  | 212.09839  | 139.52846 | 191.16652 | 207.89885   | 0.288437236  | -0.031978767 | -0.04507065  | -0.64584464 | -0.18858941 | -0.06803862  |
| 8153021 | 0.03713922  | ST3GAL1  | ST3 beta-galactoside alpha-2,3-sialyltransferase 1                                             | 0.660400304 | down | 490.24612  | 525.66766  | 342.90775 | 338.93222 | 386.07715   | 1.021752747  | 0.023484865  | 0.12692756   | -0.47165966 | -0.48924288 | -0.29883417  |
| 8078918 | 0.035044808 | SNORA62  | small nucleolar RNA, H/ACA box 62                                                              | 0.661257055 | down | 364.19046  | 477.61423  | 314.88712 | 409.47348 | 473.50455   | 0.418742458  | -0.3111798   | 0.07391516   | -0.5228017  | -0.13689995 | 0.061451275  |
| 8057374 | 0.021275803 | PLAUR    | plasminogen activator, urokinase receptor                                                      | 0.661458169 | down | 2339.031   | 2475.583   | 1638.0083 | 1624.2438 | 2182.1572   | 1.016433758  | -0.13565762  | -0.053407032 | -0.6496852  | -0.6671095  | -0.22922389  |
| 8129937 | 0.004113168 | CTED2    | Chp/p300-interacting transactivator, with Glu/Asp-rich carboxy-terminal domain, 2              | 0.661511639 | down | 3295.297   | 3302.7683  | 2179.6345 | 2186.8845 | 3470.214    | 0.9395344847 | 0.014200528  | 0.017157555  | -0.579004   | -0.58097076 | 0.085720696  |
| 8025601 | 0.002444303 | ICAM1    | intercellular adhesion molecule 1                                                              | 0.662759391 | down | 796.73     | 1066.271   | 704.3786  | 795.0153  | 1110.2345   | 0.954551461  | -0.45818648  | -0.022716522 | -0.61615941 | -0.44675922 | 0.010010015  |
| 8162759 | 0.004671053 | TBC1D2   | TBC1 domain family, member 2                                                                   | 0.664187829 | down | 1333.6609  | 1379.3358  | 915.36816 | 795.3933  | 1045.335    | 1.258584543  | -0.10582733  | -0.057202976 | -0.6475398  | -0.8555104  | -0.46099472  |
| 8083569 | 0.007560857 | TIPARP   | TCDD-inducible poly(ADP-ribose) polymerase                                                     | 0.665577427 | down | 800.02346  | 718.41437  | 480.88696 | 556.6777  | 693.9646    | 0.68091792   | 0.17272885   | 0.026387215  | -0.56093436 | -0.3429664  | -0.023073739 |
| 8046726 | 6.79E-04    | SSEA2    | sperm specific antigen 2                                                                       | 0.665794831 | down | 1816.4481  | 1829.3256  | 1216.1737 | 1334.9352 | 1563.3326   | 0.806309823  | 0.03609848   | 0.045202572  | -0.5416479  | -0.40716457 | -0.196070358 |
| 8026047 | 0.030289765 | JUNB     | jun B proto-oncogene                                                                           | 0.665986428 | down | 514.21783  | 583.78015  | 385.43176 | 506.51953 | 776.689     | 0.389519774  | -0.2766069   | -0.092477165 | -0.67891246 | -0.2819821  | 0.33507505   |
| 8085914 | 0.011053873 | SLCA7    | solute carrier family 4, sodium bicarbonate cotransporter, member 7                            | 0.666183817 | down | 908.22675  | 933.9741   | 621.5363  | 625.6576  | 746.6646    | 0.986809215  | -0.09566685  | -0.06187439  | -0.64788216 | -0.63358563 | -0.37973595  |
| 7920642 | 0.007112539 | MUC1     | mucin 1, cell surface associated                                                               | 0.666460908 | down | 237.69295  | 262.76578  | 174.0144  | 176.91096 | 240.38835   | 0.967363212  | -0.056384247 | 0.10218763   | -0.48322025 | -0.46546287 | -0.026465887 |
| 8127502 | 0.04578795  | C6orf155 | chromosome 6 open reading frame 155                                                            | 0.666490713 | down | 253.39986  | 325.00436  | 215.21532 | 247.57234 | 271.5355    | 0.075280053  | -0.31392765  | 0.03699525   | -0.5438481  | -0.3438274  | -0.20739634  |
| 8005048 | 0.001123286 | MYOC     | myocardin                                                                                      | 0.666554685 | down | 60.979584  | 68.44672   | 45.08441  | 51.9073   | 56.261265   | 0.724196318  | -0.18224399  | -0.016976833 | -0.60218173 | -0.414598   | -0.2989594   |
| 7956426 | 1.36E-04    | INHBE    | inhibin, beta E                                                                                | 8.135448    | up   | 110.78947  | 112.143745 | 893.12787 | 328.81845 | 87.88285    | 0.27743804   | 0.16475455   | 0.18552525   | 3.209747    | 1.7646679   | -0.14547174  |
| 7954398 | 2.81E-04    | C12orf39 | chromosome 12 open reading frame 39                                                            | 7.936671    | up   | 86.517296  | 80.11077   | 654.7015  | 319.47266 | 86.78193    | 0.516578057  | 0.114854296  | 0.007533868  | 2.9960678   | 1.9908687   | 0.12313318   |
| 7940582 | 6.39E-05    | BEST1    | bestrophin 1                                                                                   | 7.259951    | up   | 107.290306 | 110.00526  | 796.24138 | 381.65372 | 92.619545   | 0.39585289   | -0.097455345 | -0.0626789   | 1.7241911   | -0.3110882  | 0.12613318   |
| 7915543 | 8.92E-06    | SLC6A9   | solute carrier family 6 (neurotransmitter transporter, glycine), member 9                      | 5.264593    | up   | 234.17644  | 274.5486   | 1443.3065 | 789.4116  | 224.01521   | 0.440521514  | -0.29350868  | -0.0655907   | 2.3307314   | 1.4538601   | -0.3619688   |
| 7964460 | 7.66E-04    | DDIT3    | DNA-damage-inducible transcript 3                                                              | 4.384938    | up   | 417.9269   | 422.02307  | 1854.5094 | 1477.0352 | 614.8411    | 0.736488535  | 0.006955147  | 0.02014192   | 2.1526983   | 1.8408579   | 0.5798149    |
| 8082916 | 2.58E-04    | IL20RB   | interleukin 20 receptor beta                                                                   | 4.0784883   | up   | 94.1616    | 92.86446   | 383.3134  | 156.43648 | 0.218875028 | -0.001752218 | -0.01950852  | 2.0085258    | 0.7253536   | 0.1261392   | 0.1261392    |
| 7981290 | 3.29E-04    | WARS     | tryptophanyl-tRNA synthetase                                                                   | 3.9474723   | up   | 968.5322   | 977.06586  | 3834.071  | 2897.501  | 1235.3126   | 0.6472184699 | -0.0566831   | -0.049841254 | 1.9310879   | 1.523397    | 0.3028113    |
| 7965979 | 1.23E-04    | ALDH1L2  | aldehyde dehydrogenase 1 family, member L2                                                     | 3.9092891   | up   | 424.14377  | 388.99158  | 1507.8383 | 862.9092  | 252.75695   | 0.135276895  | 0.16036605   | 0.02861754   | 1.9955238   | 1.1489076   | -0.56336325  |
| 8102800 | 0.003536172 | SLC7A11  | solute carrier family 7, (cationic amino acid transporter, y+ system) member 11                | 3.642926    | up   | 1320.6085  | 1292.1302  | 4535.8013 | 3125.7686 | 1065.652    | 0.565297265  | 0.016830444  | -0.028644243 | 1.8364534   | 1.3034706   | -0.255222    |
| 8141150 | 8.81E-04    | ASNS     | asparagine synthetase (glutamine-hydrolyzing)                                                  | 3.479328    | up   | 417.16806  | 363.2513   | 1261.5853 | 1048.7379 | 373.82153   | 0.763064295  | 0.230388     | 0.022573471  | 1.8213822   | 1.5641598   | 0.075330414  |
| 8006531 | 0.001908512 | SLFN5    | schlafen family member 5                                                                       | 3.0873232   | up   | 337.89438  | 290.01025  | 515.1795  | 530.3796  | 357.77628   | 0.3844688641 | 0.21122074   | -0.010301908 | 1.6160455   | 0.8577216   | 0.28797216   |
| 8000574 | 6.02E-04    | NUPR1    | nuclear protein, transcriptional regulator, 1                                                  | 2.9977584   | up   | 144.42157  | 143.11455  | 428.4447  | 322.72668 | 170.4084    | 0.62948877   | -0.10403665  | -0.11715126  | 1.4667329   | 1.0612403   | 0.1424826    |
| 7982868 | 5.73E-04    | CHAC1    | ChaC, cation transport regulator homolog 1 (E. coli)                                           | 2.9877472   | up   | 283.88522  | 283.00122  | 836.3957  | 636.4451  | 435.4691    | 0.638638322  | 0.122963585  | 0.129018     | 1.708076    | 1.3087331   | 0.76750135   |
| 8060344 | 3.35E-04    | TRIB3    | tribbles homolog 3 (Drosophila)                                                                | 2.9265392   | up   | 347.01123  | 333.50507  | 974.28217 | 637.9331  | 382.6785    | 0.475091931  | -0.02376461  | -0.08418751  | 1.4650081   | 0.8755634   | -0.11586412  |
| 7995895 | 9.34E-06    | HERPUD1  | homocysteine-inducible, endoplasmic reticulum stress-inducible, ubiquitin-like domain member 1 | 2.9262369   | up   | 1435.4406  | 1492.9722  | 4366.016  | 3713.4075 | 1365.7559   | 0.772851183  | -0.072997294 | -0.015663147 | 1.5333834   | 1.3000555   | -0.1466217   |
| 8058450 | 0.002552386 | GPR1     | G protein-coupled receptor 1                                                                   | 2.8386288   | up   | 96.14231   | 86.60803   | 249.30293 | 149.61983 | 93.096306   | 0.387300401  | 0.14374685   | -0.002611637 | 1.5025826   | 0.78920716  | 0.10802594   |
| 7973530 | 1.93E-04    | PCK2     | phosphoenolpyruvate carboxykinase 2 (mitochondrial)                                            | 2.7423804   | up   | 559.6592   | 528.23724  | 1444.8608 | 1005.3794 | 491.4409    | 0.520543199  | 0.178243     | 0.08982881   | 1.5452576   | 1.0226902   | -0.010420799 |
| 8003060 | 0.00838013  | SDR42E1  | short chain dehydrogenase/reductase family 42E, member 1                                       | 2.7128682   | up   | 150.80492  | 130.53175  | 341.20828 | 432.29025 | 357.59152   | 1.432330882  | 0.078980766  | -0.11343781  | 1.3263812   | 1.6689277   | 1.3951465    |
| 7925342 | 3.34E-04    | ERO1LB   | ERO1-like beta (S. cerevisiae)                                                                 | 2.699252    | up   | 124.00741  | 123.23315  | 333.079   | 351.70413 | 167.97972   | 1.088756316  | 8.34E-05     | -0.013180415 | 1.4193792   | 1.4996761   | 0.43644205   |
| 8122724 | 0.001957933 | ULBP1    | ULL-6 binding protein 1                                                                        | 2.695981    | up   | 328.51794  | 303.01123  | 826.75995 | 788.8921  | 479.49585   | 0.927698439  | 0.083875656  | -0.029457092 | 1.4013532   | 1.3415855   | 0.6332369    |
| 8063386 | 3.03E-04    | CEBPB    | CCAAT/enhancer binding protein (C/EBP), beta                                                   | 2.644258    | up   | 471.52426  | 541.2747   | 1437.6963 | 1053.1722 | 681.1717    | 0.571045477  | -0.16798179  | 0.042170525  | 1.4450334   | 0.9990613   | 0.37187162   |
| 7904433 | 3.88E-04    | PGDH     | phosphoglycerate dehydrogenase                                                                 | 2.571933    | up   | 2215.3013  | 1929.3485  | 4938.7676 | 4341.1953 | 2170.7874   | 0.501432675  | 0.1560653    | -0.048242886 | 1.3146101   | 1.1291491   | 0.12755997   |
| 8156043 | 3.01E-04    | PSAT1    | phosphoserine aminotransferase 1                                                               | 2.5668552   | up   | 1234.7496  | 1111.1805  | 2848.2146 | 2141.3127 | 1073.194    | 0.593040862  | 0.21128781   | 0.059978485  | 1.4199804   | 1.0121197   | 0.01345094   |
| 8078991 | 0.016611537 | ZNF591   | zinc finger protein 619                                                                        | 2.5580332   | up   | 97.653564  | 99.77322   | 256.04764 | 371.49197 | 290.7941    | 1.393182262  | -0.23838012  | -0.20824115  | 1.1467938   | 1.4956633   | 0.1594409    |
| 7922846 | 9.69E-04    | FAM129A  | family with sequence similarity 129, member A                                                  | 2.522511    | up   | 496.85318  | 473.8689   | 1193.7448 | 790.41986 | 468.95218   | 0.439729903  | 0.056846935  | -0.019654592 | 1.3152099   | 0.7275689   | -0.027927399 |
| 8144874 | 0.002826294 | NSAP1    | nervous system abundant protein 1                                                              | 2.4826944   | up   | 127.6645   | 97.89689   | 246.04558 | 201.86528 | 127.23522   | 0.701784066  | 0.37538257   | -0.010275205 | 1.3016315   | 1.0374217   | 0.36655998   |
| 8002347 | 8.37E-06    | AARS     | alanyl-tRNA synthetase                                                                         | 2.188.205   | up   | 2037.8711  | 504.07236  | 4123.003  | 2160.1355 | 0.692888506 | 0.13565095   | 0.036165505  | 1.3455076    | 0.1626505   | 0.11653391  | 0.02646287   |
| 7989037 | 0.003604754 | CCPG1    | cell cycle progression 1                                                                       | 2.4698458   | up   | 120.365326 | 112.88403  | 279.32132 | 237.86668 | 162.23535   |              |              |              |             |             |              |

|         |             |          |                                                                                |           |    |           |            |           |            |             |              |              |              |             |             |              |
|---------|-------------|----------|--------------------------------------------------------------------------------|-----------|----|-----------|------------|-----------|------------|-------------|--------------|--------------|--------------|-------------|-------------|--------------|
| 7952145 | 3.05E-04    | HYOU1    | hypoxia up-regulated 1                                                         | 2.1372762 | up | 1493.7938 | 1479.6927  | 3166.6672 | 2670.3643  | 1392.6215   | 0.705802963  | 0.05802886   | 0.0456775    | 1.1414509   | 0.89784116  | -0.040647507 |
| 8042310 | 5.77E-05    | SLC1A4   | solute carrier family 1 (glutamate/neutral amino acid transporter), member 4   | 2.1366094 | up | 503.51624 | 495.51004  | 1057.8104 | 868.0915   | 489.6025    | 0.662002208  | 0.018739065  | -0.005352338 | 1.0900316   | 0.80203754  | -0.024966558 |
| 8020955 | 7.83E-04    | MOCOS    | molybdenum cofactor sulfase                                                    | 2.1353278 | up | 650.87134 | 611.50214  | 1301.8098 | 903.4279   | 518.66864   | 0.422839572  | 0.040871304  | -0.051081657 | 0.1433776   | 0.5179561   | -0.28422198  |
| 7928308 | 0.025387567 | DDIT4    | DNA-damage-inducible transcript 4                                              | 2.1305234 | up | 297.29672 | 239.98541  | 506.91653 | 436.00797  | 436.14584   | 0.734356339  | 0.52161187   | 0.19319518   | 1.2844032   | 1.0862843   | 1.092501     |
| 8027566 | 8.32E-05    | CEBPG    | CCAAT/enhancer binding protein (C/EBP), gamma                                  | 2.1145322 | up | 577.627   | 546.0611   | 1152.9513 | 1034.1185  | 642.0491    | 0.804193905  | 0.055111885  | -0.01927185  | 1.0610666   | 0.9029109   | 0.21583748   |
| 8143684 | 3.64E-05    | PDI4A    | protein disulfide isomerase family A, member 4                                 | 2.1092854 | up | 2789.8337 | 2860.128   | 6040.235  | 4760.2373  | 2337.8918   | 0.597498543  | -0.034074146 | 0.002252579  | 1.0790068   | 0.7315197   | -0.28868675  |
| 7972840 | 0.043536887 | TUBGCP3  | tubulin, gamma complex associated protein 3                                    | 2.0748003 | up | 454.688   | 410.60913  | 806.15234 | 780.5158   | 1.250377905 | -0.048116367 | -0.20058663  | 0.8523858    | 1.0215029   | 0.8079008   | -0.0079008   |
| 7908147 | 0.008749443 | TSEN15   | tRNA splicing endonuclease 15 homolog (S. cerevisiae)                          | 2.0641222 | up | 597.0811  | 555.2226   | 1131.1313 | 832.7149   | 682.13727   | 0.048183389  | -0.021001497 | -0.13722165  | 0.9038068   | 0.467508    | 0.18454552   |
| 7991401 | 4.61E-04    | HDDC3    | HD domain containing 3                                                         | 2.0633233 | up | 343.72476 | 322.69388  | 666.58655 | 624.96466  | 526.4859    | 0.878968371  | 0.096338905  | 0.011781693  | 1.0567193   | 0.96769714  | 0.7160044    |
| 8016578 | 0.010580584 | SLC35B1  | solute carrier family 35, member B1                                            | 2.0565665 | up | 994.0161  | 967.81934  | 1969.9242 | 2000.8527  | 1237.569    | 1.030863537  | 0.09807142   | 0.054139137  | 1.0943769   | 1.1229671   | 0.42445755   |
| 8070632 | 0.001467338 | CBS      | cystathionine-beta-synthase                                                    | 2.04978   | up | 310.37604 | 297.35187  | 606.6895  | 406.24063  | 262.7347    | 0.352006188  | 0.0586284    | -0.007723808 | 1.0277452   | 0.4414495   | -0.18223412  |
| 8059642 | 0.007906356 | SLC16A14 | solute carrier family 16, member 14 (monocarboxylic acid transporter 14)       | 2.0486631 | up | 196.3868  | 185.21968  | 373.5579  | 518.3869   | 370.95578   | 1.768983587  | -0.013663451 | -0.103233814 | 0.93144894  | 1.4060723   | 0.92099315   |
| 8042830 | 0.002242392 | MTFHD2   | methylentetrahydrofolate dehydrogenase (NADP+ dependent) 2                     | 2.0475454 | up | 1591.3456 | 1509.4956  | 3124.4954 | 3004.9268  | 1754.4375   | 0.925963706  | 0.067661285  | -0.001799266 | 1.0320963   | 0.9884799   | 0.2109232    |
| 8124691 | 0.00178294  | HCG8     | HLA complex group 8                                                            | 2.0264323 | up | 188.65587 | 183.6791   | 373.98282 | 311.4845   | 202.54256   | 0.671586451  | 0.021018505  | -0.013738632 | 1.0052034   | 0.69485027  | 0.11545452   |
| 7906878 | 5.63E-05    | DDR2     | discoidin domain receptor tyrosine kinase 2                                    | 2.0140543 | up | 1588.8091 | 1554.8634  | 3128.307  | 2320.3564  | 1210.7814   | 0.486508064  | 0.026777586  | -0.006105741 | 1.0039968   | 0.57304126  | -0.3673016   |
| 7919780 | 0.014615362 | GOLPH3L  | golgi phosphoprotein 3-like                                                    | 2.0121403 | up | 487.25244 | 470.85788  | 940.31476 | 933.986    | 754.37134   | 0.986518975  | -0.036946934 | -0.101431526 | 0.90729934  | 0.90726185  | 0.6033663    |
| 8027002 | 0.002793437 | GDFE15   | growth differentiation factor 15                                               | 1.9986827 | up | 813.7842  | 735.9273   | 1455.82   | 1601.661   | 2276.9539   | 1.20287136   | 0.28728613   | 0.14125855   | 1.140308    | 1.2682997   | 1.772262     |
| 8102532 | 0.03677799  | PDE5A    | phosphodiesterase 5A, cGMP-specific                                            | 1.9983747 | up | 81.85184  | 72.18064   | 149.03873 | 88.18833   | 73.2571     | 0.208275928  | 0.16315286   | -0.014070828 | 0.9847563   | 0.27625242  | -0.003092766 |
| 8084064 | 0.001031468 | MTFHD2   | methylentetrahydrofolate dehydrogenase (NADP+ dependent) 2                     | 1.995168  | up | 1247.8296 | 1202.9463  | 2403.1023 | 2197.486   | 1243.3597   | 0.828675356  | 0.10710684   | 0.054047268  | 1.0505575   | 0.92504597  | 0.10368061   |
| 8094625 | 0.006956251 | KLHL5    | kelch-like 5 (Drosophila)                                                      | 1.9949982 | up | 478.54745 | 504.10397  | 1014.9265 | 798.83954  | 585.43036   | 0.576982323  | -0.058968227 | 0.009268727  | 1.0056562   | 0.67336875  | 0.22934723   |
| 8070083 | 0.015638907 | TMD50B   | transmembrane protein 50B                                                      | 1.9906577 | up | 368.85718 | 366.9384   | 721.7793  | 703.9372   | 349.15237   | 0.949718029  | -0.06099073  | -0.09671179  | 0.8965333   | 0.8655965   | -0.15446663  |
| 7934936 | 1.41E-04    | SLC16A12 | solute carrier family 16, member 12 (monocarboxylic acid transporter 12)       | 1.970452  | up | 85.858284 | 74.93578   | 147.89522 | 94.77869   | 71.21777    | 0.271971797  | 0.16463232   | -0.024126211 | 0.95440036  | 0.31002283  | -0.09997209  |
| 8111952 | 0.015257537 | Csof28   | chromosome 5 open reading frame 28                                             | 1.9676847 | up | 125.02191 | 108.32214  | 218.55394 | 211.94318  | 159.4434    | 0.940023077  | 0.21862109   | 0.0246227    | 1.0096918   | 0.99182608  | 0.8810668    |
| 8126629 | 6.22E-04    | GTPBP2   | GTP binding protein 2                                                          | 1.9405909 | up | 141.8263  | 1311.2744  | 2539.7722 | 1617.1771  | 1155.5826   | 0.249005493  | -0.17824428  | 0.01759561   | 0.97409153  | 0.32288107  | -0.01262184  |
| 7949836 | 1.72E-04    | CDK2AP2  | cyclin-dependent kinase 2 associated protein 2                                 | 1.9315867 | up | 634.68146 | 666.65106  | 1286.1741 | 1154.7474  | 652.974     | 0.78788523   | -0.11316713  | -0.044036865 | 0.9057496   | 0.07265215  | -0.07265215  |
| 7958262 | 0.001090017 | TCF11L2  | t-complex 11 (mouse)-like 2                                                    | 1.9236261 | up | 184.23431 | 187.93938  | 359.6132  | 232.4652   | 145.66898   | 0.259362901  | -0.098145805 | -0.055423576 | 0.88840485  | 0.25202766  | -0.44724464  |
| 8132070 | 0.00208437  | GARS     | glycyl-tRNA synthetase                                                         | 1.9197464 | up | 2155.8486 | 2119.0237  | 4050.2273 | 3273.9636  | 2071.8318   | 0.59801451   | 0.14261246   | 0.11270332   | 1.053619    | 0.74870396  | 0.08833027   |
| 8053648 | 0.017803924 | KARC1    | lysine-rich coiled-coil 1                                                      | 1.9180793 | up | 111.54421 | 111.70746  | 169.6159  | 129.05824  | 0.543899896 | -0.011764686 | -0.00790952  | 0.9316718    | 0.902597988 | 0.316718    | -0.00297988  |
| 7952069 | 0.00240829  | IFT46    | intraflagellar transport 46 homolog (Chlamydomonas)                            | 1.9170656 | up | 853.78546 | 747.7027   | 1440.1168 | 1478.5597  | 1372.169    | 1.0555201    | 0.19474728   | 0.005037626  | 0.9439373   | 0.989494    | 0.879886     |
| 8109576 | 0.001807634 | THG1L    | tRNA-histidine guanylyltransferase 1-like (S. cerevisiae)                      | 1.9089563 | up | 386.6914  | 332.08408  | 632.1569  | 756.52606  | 698.0908    | 1.414463263  | 0.22252433   | 0.001196861  | 0.93398094  | 1.1951504   | 0.1798382    |
| 8091637 | 2.31E-04    | SLC33A1  | solute carrier family 33 (acetyl-CoA transporter), member 1                    | 1.9073111 | up | 553.3466  | 587.5953   | 1121.1636 | 944.7955   | 533.47064   | 0.669455438  | -0.109716415 | -0.021909714 | 0.9096305   | 0.6684825   | -0.16525616  |
| 8080781 | 0.02150105  | PXK      | PX domain containing serine/threonine kinase                                   | 1.900457  | up | 743.3056  | 749.5933   | 1388.0013 | 1252.2845  | 997.0086    | 0.878413692  | -0.12929544  | -0.120947205 | 0.80539924  | 0.65826602  | 0.32668272   |
| 8124498 | 0.047415383 | ZNF204P  | zinc finger protein 204, pseudogene                                            | 1.8946275 | up | 77.11196  | 63.794483  | 118.68064 | 149.66522  | 100.17014   | 1.564524404  | 0.068769455  | -0.21467717  | 0.70723706  | 0.1573331   | 0.43901286   |
| 8003298 | 0.00210989  | SLC7A5   | solute carrier family 7 (cationic amino acid transporter, y+ system), member 5 | 1.8932068 | up | 2201.7625 | 2396.3953  | 4513.3228 | 3520.4004  | 2109.32     | 0.530960602  | -0.22151756  | -0.105337776 | 0.81549424  | 0.45112863  | -0.28049693  |
| 7960320 | 0.032722756 | DCP1B    | DCP1 decapping enzyme homolog B (S. cerevisiae)                                | 1.8682678 | up | 634.7399  | 590.48834  | 1066.1377 | 1077.0836  | 844.04956   | 1.02301254   | 0.11821429   | 0.010766983  | 0.91246825  | 0.92835397  | 0.576657     |
| 8135480 | 0.04820614  | DNAI9    | DnaI (Hsp40) homolog, subfamily B, member 9                                    | 1.8631966 | up | 220.43982 | 222.76299  | 431.69626 | 218.03674  | 0.962439108 | -0.08323654  | -0.06944057  | 0.8283305    | 0.85747848  | -0.0978748  | -0.0978748   |
| 7980547 | 1.12E-04    | SEL1L    | sel-1 suppressor of lin-12-like (C. elegans)                                   | 1.859678  | up | 1612.3724 | 1634.3052  | 3035.1592 | 2510.3616  | 1344.6046   | 0.625373094  | 0.031039196  | 0.04875374   | 0.94380665  | 0.6696367   | -0.23225658  |
| 8128977 | 0.029683398 | TUBE1    | tubulin, epsilon 1                                                             | 1.851697  | up | 156.552   | 143.34927  | 269.48383 | 275.73862  | 201.51178   | 1.049588233  | 0.06208992   | -0.061074894 | 0.8277731   | 0.8939583   | 0.43969712   |
| 8146717 | 0.009511877 | SGK3     | serum/glucocorticoid regulated kinase family, member 3                         | 1.8452647 | up | 515.43677 | 429.9716   | 802.16595 | 770.93634  | 438.57825   | 0.916093272  | 0.190382     | -0.066981636 | 0.8168462   | 0.7661724   | -0.03847353  |
| 7940669 | 0.00213173  | C1orf83  | chromosome 11 open reading frame 83                                            | 1.8375247 | up | 71.02576  | 172.36366  | 317.60413 | 360.16122  | 330.3812    | 1.293011239  | 0.009878318  | 0.033400974  | 0.9112546   | 1.0963683   | 0.97523594   |
| 8164165 | 6.25E-05    | HSPA5    | heat shock 70kDa protein 5 (glucose-regulated protein, 78kDa)                  | 1.8302566 | up | 6610.6055 | 6816.145   | 12469.794 | 11963.3545 | 5152.6177   | 0.910422543  | -0.028258959 | 0.016888937  | 0.8889348   | 0.8626254   | -0.3661815   |
| 8117675 | 0.04270834  | PGBD1    | piggBac transposable element derived 1                                         | 1.8252828 | up | 117.25204 | 126.8302   | 223.42769 | 383.74936  | 329.20633   | 2.659687741  | -0.231939    | -0.1446832   | 0.7234363   | 1.501418    | 1.2838174    |
| 8113733 | 0.005871791 | CEP120   | centrosomal protein 120kDa                                                     | 1.8241874 | up | 485.0342  | 451.15527  | 815.3934  | 816.6844   | 728.7796    | 1.003544385  | 0.07639948   | -0.042194683 | 0.82505924  | 0.82952243  | 0.6641944    |
| 8121031 | 0.0454485   | SLC35A1  | solute carrier family 35 (CMP-stialic acid transporter), member A1             | 1.8228612 | up | 166.13106 | 157.40471  | 284.00772 | 289.20172  | 250.80444   | 1.041025881  | -0.16526985  | -0.17902279  | 0.68718195  | 0.7347266   | 0.5115006    |
| 7956785 | 9.95E-04    | XPO7     | exportin, tRNA (nuclear export receptor for tRNAs)                             | 1.8088498 | up | 1555.559  | 1388.7848  | 2515.177  | 2282.2175  | 1380.8672   | 0.79318083   | 0.108716644  | -0.04629453  | 0.8087781   | 0.6719163   | -0.053326923 |
| 8117667 | 0.0130068   | ZNF187   | zinc finger protein 187                                                        | 1.8053242 | up | 112.92312 | 110.238945 | 199.32086 | 250.52759  | 211.02968   | 1.5748275    | -0.1187884   | -0.113150276 | 0.7391076   | 1.0821161   | 0.833296     |
| 7906786 | 0.007883937 | FCRLA    | Fc receptor-like A                                                             | 1.801271  | up | 91.00763  | 95.97486   | 174.72963 | 113.29623  | 0.219940583 | -0.0854435   | -0.005344391 | 0.84367085   | 0.22911882  | -0.120749   | -0.0079008   |
| 8154381 | 5.64E-04    | Csof150  | chromosome 9 open reading frame 150                                            | 1.8010503 | up | 392.37988 | 382.76254  | 689.50195 | 402.28784  | 330.2346    | 0.063654357  | 0.014876683  | -0.015235901 | 0.8336026   | 0.055059116 | -0.22818883  |
| 8044450 | 0.00217428  | ZC3H46   | zinc finger CCHC-type containing 6                                             | 1.7954413 | up | 159.11076 | 120.41125  | 216.732   | 198.99109  | 173.2644    | 0.722375916  | 0.34781346   | -0.031549294 | 0.81278914  | 0.48484825  | -0.4942345   |
| 7945803 | 5.40E-06    | CARS     | cysteinyI-tRNA synthetase                                                      | 1.7843045 | up | 540.7121  | 500.73746  | 893.4655  | 740.07294  | 518.96216   | 0.609417856  | 0.120407425  | 0.012316088  | 0.8476779   | 0.57413226  | 0.06368985   |
| 8080884 | 4.81E-04    | MANF     | mesencephalic astrocyte-derived neurotrophic factor                            | 1.7748735 | up | 2530.1052 | 2497.4607  | 4420.5127 | 3963.0706  | 1934.0884   | 0.762127025  | -0.048445065 | -0.07000414  | 0.75771207  | 0.59770554  | -0.43478966  |
| 8044021 | 0.024556696 | IL1RL1   | interleukin 1 receptor-like 1                                                  | 1.7731018 | up | 49.501602 | 47.66171   | 85.11361  | 66.08117   | 49.734814   | 0.9491816437 | 0.07781214   | 0.029573917  | 0.85584927  | 0.50592423  | -0.08958667  |
| 7927202 | 0.039346345 | ZNF22    | zinc finger protein 22 (KIX 15)                                                | 1.76986   | up | 205.20158 | 206.91888  | 362.7437  |            |             |              |              |              |             |             |              |

|          |             |              |                                                                        |           |    |           |           |            |           |             |              |              |              |            |              |              |
|----------|-------------|--------------|------------------------------------------------------------------------|-----------|----|-----------|-----------|------------|-----------|-------------|--------------|--------------|--------------|------------|--------------|--------------|
| 7914563  | 0.011836725 | YARS         | tyrosyl-tRNA synthetase                                                | 1.7303493 | up | 1786.1788 | 1793.0977 | 3123.7678  | 2568.4934 | 1594.4066   | 0.582710696  | -0.04828008  | -0.048167545 | 0.7428958  | 0.47521433   | -0.21427219  |
| 7902810  | 0.002478396 | LMO4         | LIM domain only 4                                                      | 1.7288637 | up | 165.31047 | 148.22134 | 255.61542  | 230.17036 | 165.11449   | 0.763068318  | 0.07527208   | -0.07559776  | 0.7142264  | 0.5625054    | 0.084829964  |
| 7990080  | 0.002721994 | LAR6P        | La ribonucleoprotein domain family, member 6                           | 1.7228522 | up | 630.4463  | 638.21893 | 1105.2424  | 916.4323  | 764.4472    | 0.595716035  | -0.01824824  | -0.001680056 | 0.7831189  | 0.5195411    | 0.25943628   |
| 8009727  | 0.028333265 | ICT1         | immature colon carcinoma transcript 1                                  | 1.7201862 | up | 666.1768  | 610.77137 | 1035.0692  | 1121.7664 | 1015.1359   | 1.204331159  | -0.045372646 | -0.1779302   | 0.6046327  | 0.5822795    | 0.0822795    |
| 7939434  | 5.06E-04    | TTC17        | tetratricopeptide repeat domain 17                                     | 1.7170311 | up | 793.9441  | 874.2215  | 1497.4518  | 1219.3011 | 814.5809    | 0.535695159  | -0.1812172   | -0.04052512  | 0.739391   | 0.4426864    | -0.1420803   |
| 7995362  | 7.84E-04    | GPT2         | glutamic pyruvate transaminase (alanine aminotransferase) 2            | 1.7166622 | up | 335.2313  | 334.1229  | 555.4082   | 524.40967 | 378.2212    | 0.865972762  | 0.1110563    | 0.06567097   | 0.84527713 | 0.7572099    | 0.2892529    |
| 7936408  | 0.023418786 | UBE2D4       | DNA cross-link repair 1A                                               | 1.7150741 | up | 288.6458  | 238.9524  | 405.1857   | 448.97153 | 396.1914    | 1.263399872  | -0.10284996  | 0.67542094   | 0.6649034  | 0.64589924   | 0.64589924   |
| 7938687  | 0.002805992 | NUCB2        | nucleobindin 2                                                         | 1.7131771 | up | 928.4577  | 909.306   | 1561.4971  | 1286.1691 | 836.8327    | 0.577666093  | -0.0215861   | -0.05234593  | 0.7243287  | 0.4503066    | -0.1762708   |
| 8119898  | 0.003157177 | VEGFA        | vascular endothelial growth factor A                                   | 1.7114686 | up | 755.58466 | 812.2009  | 1383.4336  | 1141.8594 | 897.78613   | 0.577100191  | -0.062644325 | 0.033656757  | 0.8088916  | 0.5138945    | 0.18383916   |
| 7956443  | 0.002205542 | MARS         | methionyl-tRNA synthetase                                              | 1.7002078 | up | 2258.5586 | 2323.1384 | 3930.9846  | 3401.9382 | 2529.6863   | 0.670995973  | -0.029896101 | 0.014026324  | 0.7797375  | 0.56973076   | 0.1435407    |
| 8132523  | 0.03353111  | UBE2D4       | ubiquitin-conjugating enzyme E2D 4 (putative)                          | 1.6998789 | up | 447.6122  | 470.0448  | 787.3663   | 770.8081  | 680.8587    | 0.947818852  | -0.2005148   | -0.13719018  | 0.62824184 | 0.6043002    | 0.42658648   |
| 7995552  | 0.010514076 | CYLD         | cyldromatosis (urban tumor syndrome)                                   | 1.6997728 | up | 210.09816 | 205.60329 | 348.21762  | 407.34293 | 345.13147   | 1.414581831  | -0.014635404 | -0.037519455 | 0.7278225  | 0.9611319    | 0.7194746    |
| 7928671  | 0.019061523 | C10orf57     | chromosome 10 open reading frame 57                                    | 1.6985775 | up | 469.05557 | 467.34998 | 791.0567   | 681.20044 | 587.4138    | 0.660630277  | -0.17209053  | -0.15389697  | 0.61043006 | 0.39484534   | 0.18751939   |
| 8127787  | 0.014947082 | IBTK         | inhibitor of Bruton agammaglobulinemia tyrosine kinase                 | 1.6962317 | up | 480.10718 | 462.33362 | 789.64056  | 602.32697 | 444.66544   | 0.427712746  | 0.06207053   | 0.007452329  | 0.7697856  | 0.38594595   | -0.048515003 |
| 8095303  | 0.007343383 | LPHN3        | latrophilin 3                                                          | 1.6939843 | up | 161.65205 | 141.15736 | 241.62776  | 134.55766 | 111.68287   | -0.065688004 | 0.20223077   | 0.009727033  | 0.7701502  | -0.065491356 | -0.34384075  |
| 7967072  | 0.014686932 | COQ5         | coenzyme Q5 homolog, methyltransferase (S. cerevisiae)                 | 1.6922517 | up | 547.7314  | 488.37146 | 823.055    | 752.7629  | 643.73834   | 0.89974434   | 0.05979125   | -0.11450227  | 0.6444419  | 0.5208092    | 0.29496703   |
| 8135514  | 0.007166177 | IFRD1        | interferon-related developmental regulator 1                           | 1.6914634 | up | 443.1434  | 400.13248 | 681.9739   | 497.6005  | 348.39978   | 0.345825748  | 0.16135311   | 0.013334592  | 0.77160645 | 0.32561302   | 0.017666434  |
| 8179326  | 0.007983442 | C1orf48      | chromosome 6 open reading frame 48                                     | 1.6884508 | up | 954.2178  | 947.3493  | 1606.9393  | 1891.5157 | 1511.8063   | 1.431444382  | -0.019705137 | -0.03460884  | 0.7210913  | 0.96283054   | 0.6422491    |
| 8178090  | 0.007954271 | C1orf48      | chromosome 6 open reading frame 48                                     | 1.6870383 | up | 955.94653 | 948.04083 | 1606.9597  | 1887.108  | 1512.0704   | 1.425951295  | -0.018024445 | -0.034543037 | 0.7199497  | 0.95823544   | 0.6415618    |
| 8161774  | 0.004885592 | TRPM6        | transient receptor potential cation channel, subfamily M, member 6     | 1.6743325 | up | 145.88263 | 143.31879 | 238.18703  | 210.13281 | 19.79098    | 0.704282276  | 0.02241691   | -0.00502348  | 0.7358626  | 0.5532654    | -0.25846544  |
| 7911718  | 0.001986883 | LOC100129534 | small nuclear ribonucleoprotein polypeptide N pseudogene               | 1.6731938 | up | 137.98839 | 119.94094 | 200.49626  | 150.06401 | 125.42377   | 0.373942652  | 0.17043893   | -0.035239536 | 0.70736504 | 0.2878882    | 0.03125127   |
| 7927146  | 0.009443624 | CSGALNACT2   | chondroitin sulfate N-acetylgalactosaminyltransferase 2                | 1.6667256 | up | 468.68967 | 464.93213 | 773.6694   | 809.22314 | 534.0249    | 1.115858562  | 0.022857985  | 0.005192757  | 0.74220943 | 0.812465     | 0.20840995   |
| 7968344  | 0.022100614 | ALOX5AP      | arachidonate 5-lipoxygenase-activating protein                         | 1.6589859 | up | 71.214096 | 66.102684 | 111.62052  | 836.92944 | 678.6809    | 0.535093168  | -0.09863424  | -0.00975291  | 0.7205486  | 0.23345344   | 0.0626735    |
| 8174361  | 0.005968227 | TSC22D3      | TSC22 domain family, member 3                                          | 1.6569492 | up | 206.16425 | 202.75066 | 337.02792  | 279.49448 | 210.75304   | 0.571532514  | -0.02513663  | -0.04649989  | 0.6820294  | 0.41826725   | 0.012399612  |
| 7961371  | 0.003959347 | DUSP16       | dual specificity phosphatase 16                                        | 1.6510566 | up | 309.4222  | 315.9098  | 520.62177  | 494.6185  | 837.9263511 | -0.020578384 | 0.004478384  | 0.73276881   | 0.6569322  | 0.00637288   | 0.00637288   |
| 8018694  | 0.029906275 | PRPSAP1      | phosphoribosyl pyrophosphate synthetase-associated protein 1           | 1.6500921 | up | 331.5431  | 335.33243 | 545.2666   | 600.21027 | 586.6438    | 1.26178566   | -0.15213823  | -0.11978372  | 0.6027629  | 0.74563056   | 0.70905113   |
| 80051864 | 0.023155889 | LOC728819    | hCG1645220                                                             | 1.6437445 | up | 98.52338  | 82.91337  | 137.53847  | 161.2342  | 119.85441   | 1.433788313  | 0.25920105   | 0.002901713  | 0.71988773 | 0.9637516    | 0.53733803   |
| 8143633  | 0.009392705 | OR2A4        | olfactory receptor, family 2, subfamily A, member 4                    | 1.6433091 | up | 209.4356  | 190.82213 | 313.7039   | 254.59198 | 197.27538   | 0.518952893  | 0.14877796   | 0.00970618   | 0.7263101  | 0.42910004   | 0.050038322  |
| 7978801  | 0.007201058 | MDGA2        | MAM domain containing glycosylphosphatidylinositol anchor 2            | 1.632271  | up | 261.7648  | 226.66136 | 372.82678  | 228.93135 | 146.86955   | 0.015530261  | 0.17942317   | -0.016815027 | 0.6900657  | -0.004071713 | -0.64497375  |
| 7978492  | 0.023376005 | HEATR5A      | HEAT repeat containing 5A                                              | 1.6309397 | up | 627.5982  | 581.19196 | 932.9799   | 786.59424 | 653.2994    | 0.58388096   | 0.05235513   | -0.06943607  | 0.63626736 | 0.39078394   | 0.123078026  |
| 7920877  | 0.006113945 | ARHGEF2      | Rho/Rac guanine nucleotide exchange factor (GEF) 2                     | 1.6300415 | up | 738.3471  | 624.79315 | 1021.24054 | 836.92944 | 678.6809    | 0.535093168  | -0.14268398  | -0.030748367 | 0.6741603  | 0.3848845    | 0.08266735   |
| 7971780  | 0.0168138   | NEK3         | NIMA (never in mitosis gene a)-related kinase 3                        | 1.6298323 | up | 69.67791  | 78.338356 | 129.50104  | 145.7397  | 105.77474   | 1.137392653  | -0.19108804  | -0.013969739 | 0.69075376 | 0.8734234    | 0.41886362   |
| 8106998  | 0.001231756 | MAP1B        | microtubule-associated protein 1B                                      | 1.628683  | up | 2146.674  | 1957.0166 | 3181.0947  | 2200.4705 | 1614.2865   | 0.19887555   | 0.095742546  | -0.041424114 | 0.6623271  | 0.13064289   | -0.3161564   |
| 7963646  | 0.04896932  | AAAS         | achalasia, adrenocortical insufficiency, alacrimia                     | 1.6264588 | up | 1416.4818 | 1317.1671 | 2095.7834  | 2072.1174 | 1908.9131   | 0.99605055   | -0.10646979  | -0.19581223  | 0.505922   | 0.49353226   | 0.37527528   |
| 8158671  | 0.024323106 | ASS1         | argininosuccinate synthase 1                                           | 1.6251048 | up | 161.60022 | 168.36987 | 278.11545  | 199.35968 | 168.81824   | 0.282367662  | -0.023047766 | 0.036824863  | 0.7373576  | 0.72156556   | 0.0352826584 |
| 8088001  | 0.02697911  | NEK4         | NIMA (never in mitosis gene a)-related kinase 4                        | 1.6244434 | up | 140.87708 | 400.22318 | 638.7829   | 741.7591  | 712.17017   | 1.431657951  | 0.042998314  | 0.001749605  | 0.70168847 | 0.9710905    | 0.85899323   |
| 8059350  | 0.043360043 | API53        | adaptor-related protein complex 1, sigma 3 subunit                     | 1.6229432 | up | 169.08005 | 155.6494  | 253.30108  | 234.17659 | 225.45024   | 0.802512435  | -0.031703155 | -0.09425831  | 0.6043542  | 0.50960463   | 0.4546237    |
| 8157463  | 0.013612976 | C1orf91      | chromosome 9 open reading frame 91                                     | 1.6186119 | up | 431.18228 | 424.547   | 679.4196   | 666.00183 | 500.29907   | 0.947354992  | -0.018586159 | -0.052015305 | 0.64274186 | 0.6142604    | 0.19866149   |
| 8075182  | 6.74E-04    | XBP1         | X-box binding protein 1                                                | 1.617089  | up | 1154.6929 | 1226.3903 | 1981.7137  | 1731.9948 | 890.61084   | 0.669388106  | -0.10875797  | -0.019029299 | 0.6743698  | 0.4779326    | -0.4852099   |
| 8178324  | 0.016439924 | NCRNA00171   | ZNRD1 antisense RNA (non-protein coding)                               | 1.6139435 | up | 93.63534  | 86.93632  | 142.19182  | 139.12761 | 112.34143   | 0.944544706  | 0.065286196  | -0.03134203  | 0.65924805 | 0.6325326    | 0.33649364   |
| 8124622  | 0.010265432 | ZNF311       | zinc finger protein 311                                                | 1.6132306 | up | 65.005135 | 59.59671  | 96.32996   | 96.57552  | 93.29342    | 1.006684952  | 0.21815062   | 0.08762661   | 0.7775793  | 0.78594637   | 0.7321811    |
| 8129558  | 0.009227568 | OR2A4        | olfactory receptor, family 2, subfamily A, member 4                    | 1.6096891 | up | 207.27678 | 188.93994 | 304.29056  | 253.27466 | 193.2487    | 0.557731896  | 0.18527508   | 0.045697052  | 0.7324791  | 0.46929708   | 0.07946571   |
| 8103755  | 0.006671816 | FBXO8        | F-box protein 8                                                        | 1.6089678 | up | 311.87247 | 277.34805 | 446.00626  | 467.41968 | 419.1063    | 1.126963401  | 0.08888181   | -0.083274685 | 0.60286075 | 0.67507076   | 0.5182409    |
| 7947580  | 0.03262468  | TRA6F        | TNF receptor-associated factor 6                                       | 1.6063966 | up | 390.04434 | 349.63818 | 558.5208   | 691.96063 | 611.6003    | 1.638826868  | 0.037810642  | -0.12939136  | 0.5544367  | 0.8718125    | 0.6966219    |
| 8106516  | 0.020119268 | JMY          | junction mediating and regulatory protein, p53 cofactor                | 1.6045481 | up | 442.9485  | 451.2544  | 712.9756   | 782.70685 | 551.57275   | 1.266433327  | 0.16886203   | 0.17458217   | 0.85674924 | 0.9897798    | 0.47584343   |
| 8178275  | 0.008939467 | ZNF311       | zinc finger protein 311                                                | 1.6022812 | up | 64.51721  | 59.28325  | 95.19534   | 95.62298  | 91.954185   | 1.011907967  | 0.20740302   | 0.081203304  | 0.7613306  | 0.7716549    | 0.7121728    |
| 8005475  | 0.001575798 | TRIM16L      | tripartite motif-containing 16-like /// tripartite motif-containing 16 | 1.6010133 | up | 1443.9999 | 1600.6108 | 2562.073   | 2282.4907 | 1623.2461   | 0.709211345  | -0.15670872  | -0.006662369 | 0.6723229  | 0.50566417   | 0.015154203  |
| 8032392  | 0.002120329 | MKNK2        | MAP kinase interacting serine/threonine kinase 2                       | 1.6006588 | up | 702.2495  | 712.39667 | 1137.3705  | 1115.324  | 917.6662    | 0.948122688  | 0.05910142   | 0.07612896   | 0.7574908  | 0.7209441    | 0.4384006    |
| 8116494  | 0.048560996 | ZFP62        | zinc finger protein 62 homolog (mouse)                                 | 1.5942031 | up | 148.62605 | 138.5424  | 221.37907  | 225.08513 | 214.67705   | 0.944739365  | 0.09695021   | -0.006985506 | 0.66585    | 0.7090287    | 0.6400037    |
| 7975787  | 1.47E-04    | JDP2         | Jun dimerization protein 2                                             | 1.5902221 | up | 314.33484 | 318.60376 | 506.38647  | 401.25912 | 306.0528    | 0.440164912  | -0.058338482 | -0.03040499  | 0.63882416 | 0.30175146   | -0.09175523  |
| 8096919  | 0.018538345 | ALPK1        | alpha-kinase 1                                                         | 1.5891827 | up | 212.09502 | 213.6973  | 342.9717   | 234.76064 | 770.74437   | 0.163051657  | -0.07359743  | -0.06289244  | 0.60539263 | 0.07468414   | -0.40559325  |
| 7898192  | 0.041427694 | DNAIC16      | Dnal (Hsp40) homolog, subfamily C, member 16                           | 1.5877929 | up | 702.11084 | 715.7072  | 1119.621   | 1007.6833 | 844.2796    | 0.722867354  | -0.11568197  | -0.088373505 | 0.5786492  | 0.17713769   | 0.17713769   |
| 8176230  | 0.034947608 | RAB39B       | RAB39B, member RAS oncogene family                                     | 1.5863764 | up | 159.67873 | 143.5229  | 231.23729  |           |             |              |              |              |            |              |              |

|         |             |           |                                                                                        |           |      |            |            |            |           |            |              |              |              |             |             |              |
|---------|-------------|-----------|----------------------------------------------------------------------------------------|-----------|------|------------|------------|------------|-----------|------------|--------------|--------------|--------------|-------------|-------------|--------------|
| 8013399 | 0.024008296 | ULK2      | unc-51-like kinase 2 (C. elegans)                                                      | 1.5651938 | up   | 189.0769   | 168.4933   | 260.56027  | 253.19063 | 221.32593  | 0.919953486  | 0.047658127  | -0.12337494  | 0.5229664   | 0.48220047  | 0.2896913    |
| 8136983 | 0.03958085  | OR2A9P    | olfactory receptor, family 2, subfamily A, member 9 pseudogene                         | 1.563798  | up   | 332.9329   | 343.52722  | 547.27075  | 432.49512 | 346.18222  | 0.436666136  | -0.092357315 | -0.04568863  | 0.59936553  | 0.27749157  | -0.02539403  |
| 7958275 | 0.007633508 | POLR3B    | polymerase (RNA) III (DNA directed) polypeptide B                                      | 1.5635566 | up   | 445.17227  | 412.62656  | 642.9306   | 539.0944  | 482.5674   | 0.549134266  | 0.19007206   | 0.07706865   | 0.7219      | 0.46958318  | 0.31094518   |
| 8139723 | 0.004411023 | FKBP9L    | FK506 binding protein 9-like                                                           | 1.556663  | up   | 118.38718  | 127.76746  | 198.8799   | 163.04128 | 114.20623  | 0.049602824  | -0.17426348  | -0.06582892  | 0.57263374  | 0.237398    | -0.23162413  |
| 7915870 | 0.036720373 | ATPAF1    | ATP synthase mitochondrial F1 complex assembly factor 1                                | 1.5542564 | up   | 200.48988  | 187.79402  | 286.80838  | 289.1941  | 264.67935  | 1.02404687   | 0.012542089  | -0.08717346  | 0.5490511   | 0.56142694  | 0.43428788   |
| 7931930 | 0.038582783 | PRKQ      | protein kinase C, theta                                                                | 1.5542555 | up   | 103.65005  | 109.172356 | 168.1496   | 200.17912 | 177.25838  | 1.543082685  | 0.08595846   | 0.14595588   | 0.78216094  | 1.0422946   | 0.859986     |
| 7905598 | 0.038695376 | SNAPIN    | SNAP-associated protein                                                                | 633.9343  | up   | 633.9343   | 561.9866   | 855.1076   | 869.00415 | 781.73926  | 1.04740892   | -0.04696041  | -0.20188332  | 0.43024412  | 0.4509808   | 0.2956562    |
| 7976766 | 3.53E-04    | WDR25     | WD repeat domain 25                                                                    | 1.5466501 | up   | 185.89563  | 182.0321   | 281.31284  | 247.3893  | 206.10744  | 0.658306938  | 0.016863188  | -0.012581985 | 0.6164296   | 0.43121514  | 0.16758044   |
| 8086482 | 0.006542542 | ZNF445    | zinc finger protein 445                                                                | 1.5451906 | up   | 675.06854  | 624.0408   | 965.1899   | 1182.1384 | 1129.6034  | 1.635934552  | 0.053244274  | -0.050335567 | 0.57744914  | 0.8752921   | 0.808836     |
| 8165735 | 0.003083421 | CSF2RA    | colony stimulating factor 2 receptor, alpha, low-affinity (granulocyte-macrophage)     | 1.5447508 | up   | 118.799706 | 123.06632  | 189.90373  | 154.45436 | 127.89704  | 0.469617838  | -0.008430322 | 0.043230217  | 0.6706044   | 0.3696885   | 0.10099745   |
| 8084219 | 0.03399178  | KLHL24    | kelch-like 24 (Drosophila)                                                             | 1.5441898 | up   | 287.58337  | 252.52698  | 393.90585  | 441.1332  | 349.2645   | 1.33404815   | 0.2571087    | 0.066991486  | 0.69384164  | 0.86944073  | 0.5376784    |
| 7944554 | 0.020323345 | TMEM136   | transmembrane protein 136                                                              | 1.5439148 | up   | 116.300514 | 108.84841  | 170.15251  | 175.28845 | 155.57695  | 1.083778083  | 0.07408619   | -0.010292213 | 0.6163009   | 0.6740839   | 0.50532883   |
| 8117685 | 0.017583216 | ZKSCAN3   | zinc finger with KRAB and SCAN domains 3                                               | 1.5427468 | up   | 98.630554  | 89.22947   | 136.98218  | 148.19748 | 139.50392  | 1.234862063  | 0.26451603   | 0.12587674   | 0.75137806  | 0.8663809   | 0.7828776    |
| 8155490 | 0.00192449  | LOC554249 | hypothetical LOC554249                                                                 | 1.5392023 | up   | 481.20312  | 505.80173  | 778.2713   | 718.11084 | 573.49677  | 0.779203013  | -0.10930506  | -0.03929742  | 0.58288544  | 0.46536732  | 0.1436599    |
| 8060949 | 0.005376509 | ANKRD5    | ankyrin repeat domain 5                                                                | 1.5372932 | up   | 146.67015  | 136.36429  | 209.53654  | 197.52246 | 153.85071  | 0.83581098   | 0.053705376  | -0.053385574 | 0.56700677  | 0.48570475  | 0.11715063   |
| 7935627 | 0.002200797 | GOT1      | glutamic-oxaloacetic transaminase 1, soluble (aspartate aminotransferase 1)            | 1.5367758 | up   | 1951.5502  | 1934.7926  | 2981.8875  | 2719.8914 | 1971.6234  | 0.479787627  | -0.023309072 | -0.026882172 | 0.59302455  | 0.4629704   | -0.039273262 |
| 8176306 | 0.00338763  | CSF2RA    | colony stimulating factor 2 receptor, alpha, low-affinity (granulocyte-macrophage)     | 1.5321349 | up   | 118.71347  | 123.15145  | 188.45534  | 154.32768 | 127.896065 | 0.476672412  | -0.009845257 | 0.043628216  | 0.6591716   | 0.3675939   | 0.10080942   |
| 7898736 | 0.002337894 | HSPC157   | hypothetical LOC29092                                                                  | 1.5321121 | up   | 210.54456  | 189.27501  | 290.25104  | 245.51732 | 226.145    | 0.556986742  | 0.1831379    | 0.02741623   | 0.64293814  | 0.4038466   | 0.2834638    |
| 8095139 | 0.039356095 | SRD5A3    | steroid 5 alpha-reductase 3                                                            | 1.531388  | up   | 343.02493  | 307.17093  | 463.51688  | 458.4738  | 444.39468  | 0.967744096  | 0.064870834  | -0.09997082  | 0.51486903  | 0.4921271   | 0.4546248    |
| 8077458 | 0.00349041  | EDEM1     | ER degradation enhancer, mannosidase alpha-like 1                                      | 1.5246615 | up   | 617.828    | 621.87335  | 951.58673  | 898.7111  | 633.4428   | 0.839631531  | -0.01641256  | -0.007282257 | 0.6012068   | 0.523976    | 0.020037016  |
| 8150276 | 0.010517878 | PPAPDC1B  | phosphatidic acid phosphatase type 2 domain containing 1B                              | 1.521579  | up   | 499.42642  | 490.9399   | 749.8833   | 743.94196 | 570.611    | 0.977055449  | 0.032548267  | 0.004759153  | 0.6103284   | 0.605511    | 0.2198035    |
| 8151457 | 0.013106035 | HEY1      | hair/enhancer-of-split related with YRPW motif 1                                       | 1.5210949 | up   | 78.87292   | 78.50875   | 120.604774 | 90.52532  | 76.77533   | 0.285456175  | -0.003405889 | -0.006337802 | 0.59877235  | 0.19893122  | -0.044657547 |
| 8031522 | 0.012538771 | ZNF581    | zinc finger protein 581                                                                | 1.5205765 | up   | 261.91196  | 244.63269  | 369.41837  | 443.86816 | 425.79947  | 1.596621263  | 0.20325057   | 0.09927877   | 0.7038972   | 0.96572083  | 0.9097865    |
| 8151281 | 0.03991451  | TRAM1     | translocation associated membrane protein 1                                            | 1.5174199 | up   | 1938.9447  | 1948.8868  | 2964.9355  | 2862.4148 | 1983.4419  | 0.899098636  | 0.048779488  | 0.052267381  | 0.65388775  | 0.61247605  | 0.08702824   |
| 8110399 | 0.01033567  | B4GALT7   | xylosylprotein beta 1,4-galactosyltransferase, polypeptide 7 (galactosyltransferase D) | 1.515146  | up   | 429.68066  | 383.928    | 578.4077   | 546.98956 | 551.00385  | 0.838268951  | 0.092648186  | -0.03837681  | 0.56108     | 0.9057554   | 0.0042242    |
| 7934906 | 0.005518534 | ACTA2     | actin, alpha 2, smooth muscle, aorta                                                   | 1.5142155 | up   | 313.5538   | 265.46765  | 401.62704  | 379.26517 | 402.22916  | 0.835766964  | 0.29499802   | 0.050553482  | 0.64912397  | 0.5685932   | 0.64417535   |
| 8156633 | 0.007536652 | KIAA1529  | SUGT1-130002K09R8K pseudogene                                                          | 1.5102258 | up   | 110.684784 | 109.66388  | 166.48662  | 166.35094 | 147.24538  | 0.997612224  | 0.030245781  | 0.017985502  | 0.61274976  | 0.6198104   | 0.44383398   |
| 8048772 | 9.74E-04    | RHBDD1    | rhomboid domain containing 1                                                           | 1.5098819 | up   | 605.09344  | 611.1954   | 921.86395  | 700.8754  | 509.8071   | 0.288667778  | -0.030434608 | -0.01686128  | 0.57575443  | 0.18165143  | -0.2739866   |
| 8111457 | 0.02667242  | RAD1      | RAD1 homolog (S. pombe)                                                                | 1.5089439 | up   | 422.85144  | 384.86368  | 580.3896   | 684.19653 | 637.251    | 1.530911349  | 0.18006961   | 0.042675335  | 0.63621455  | 0.8824692   | 0.7785873    |
| 8121861 | 0.026779495 | NCOA7     | nuclear receptor coactivator 7                                                         | 1.5075307 | up   | 286.90192  | 278.47595  | 421.29385  | 376.0085  | 279.29288  | 0.682915447  | 0.13577843   | 0.08661413   | 0.6788014   | 0.520552    | 0.0958856    |
| 7987369 | 0.03305818  | ATPBD4    | ATP binding domain 4                                                                   | 1.5073628 | up   | 179.47176  | 167.10631  | 255.27278  | 160.51291 | 132.06102  | -0.074783532 | 0.13281028   | 0.036391895  | 0.6284186   | -0.02936155 | -0.3088239   |
| 7961829 | 0.019853497 | BCAT1     | branched chain amino-acid transaminase 1, cytosolic                                    | 1.5045705 | up   | 2104.7278  | 1874.483   | 2823.6584  | 2074.886  | 1544.153   | 0.21113379   | 0.10452938   | -0.058176357 | 0.5311753   | 0.09540272  | -0.34498248  |
| 8002897 | 0.0032361   | TMEM231   | transmembrane protein 231                                                              | 1.5035963 | up   | 233.02434  | 208.59729  | 312.52844  | 325.23535 | 111.27747  | 1.122262767  | 0.113380276  | -0.029391924 | 0.5590253   | 0.60386676  | 0.54118985   |
| 8155393 | 0.004356206 | LOC554249 | hypothetical LOC554249                                                                 | 1.5033603 | up   | 266.97946  | 272.085    | 410.8436   | 369.17465 | 287.3503   | 0.699701856  | -0.038652897 | 9.10E-04     | 0.58910084  | 0.43910757  | 0.07690557   |
| 8056491 | 0.002450885 | SCN9A     | sodium channel, voltage-gated, type IX, alpha subunit                                  | 1.5031788 | up   | 81.69095   | 82.13904   | 123.85773  | 90.62582  | 79.69215   | 0.203428727  | 0.009299914  | 0.0198706    | 0.60788727  | 0.16116524  | -0.027059795 |
| 7994362 | 0.009087144 | CCDC101   | coiled-coil domain containing 101                                                      | 1.50276   | up   | 502.0447   | 460.66653  | 694.41144  | 810.46484 | 771.1905   | 1.496495945  | 0.08008131   | -0.04073016  | 0.54688454  | 0.7759101   | 0.7047415    |
| 8161451 | 0.004752463 | LOC554249 | hypothetical LOC554249                                                                 | 1.5017326 | up   | 267.40588  | 272.0479   | 410.42517  | 370.61813 | 288.00314  | 0.712329633  | -0.035800297 | 0.00177447   | 0.58840245  | 0.44563356  | 0.081113815  |
| 8009243 | 0.042790364 | C17orf60  | chromosome 17 open reading frame 60                                                    | 1.5009941 | up   | 87.725555  | 95.012665  | 145.14644  | 97.54429  | 84.01386   | 0.050497394  | -0.083566986 | 0.03065904   | 0.6165773   | 0.06918796  | -0.14951293  |
| 8084634 | 5.30E-04    | DNAJB11   | DnaJ (Hsp40) homolog, subfamily B, member 11                                           | 1.5000783 | up   | 1268.5155  | 1311.2109  | 1967.1764  | 1968.9462 | 1162.2415  | 1.002698008  | -0.046434086 | 0.003805796  | 0.58884364  | 0.59132165  | -0.17126083  |
| 8037387 | 9.49E-04    | ---       | ---                                                                                    | 2.2774358 | down | 260.91446  | 312.5325   | 138.41777  | 140.18652 | 239.6877   | 0.9898841468 | -0.3209381   | -0.001963298 | -1.1893736  | -1.1594867  | -0.4134623   |
| 8017096 | 0.036460076 | ---       | ---                                                                                    | 2.2228432 | down | 144.47345  | 157.06801  | 68.10211   | 99.81832  | 162.20164  | 0.6435501499 | 0.050239086  | 0.18469381   | -0.9677124  | -0.42549658 | 0.1860245    |
| 8043480 | 0.01602308  | ---       | ---                                                                                    | 1.9300326 | down | 312.26727  | 352.76254  | 183.54497  | 223.12126 | 263.06128  | 0.766121863  | -0.13520098  | 0.063915886  | -0.88470936 | -0.5851655  | -0.35574403  |
| 7919405 | 0.04763453  | ---       | ---                                                                                    | 1.80442   | down | 321.64218  | 368.55054  | 195.59859  | 289.81775 | 343.67392  | 0.45522927   | -0.09238275  | 0.053483326  | -0.79805183 | -0.23137856 | -0.09382025  |
| 7919155 | 0.0481038   | ---       | ---                                                                                    | 1.8016558 | down | 320.86618  | 367.8326   | 195.48375  | 289.25015 | 342.32297  | 0.455949953  | -0.08294741  | 0.06278642   | -0.786537   | -0.22162819 | -0.08533224  |
| 8161568 | 0.026735732 | ---       | ---                                                                                    | 1.7566613 | down | 308.15817  | 326.57648  | 186.27724  | 225.69167 | 253.13051  | 0.719068827  | -0.07681719  | 0.029789606  | -0.7830464  | -0.49090815 | -0.32892656  |
| 7981333 | 0.037372757 | ---       | ---                                                                                    | 1.6405845 | down | 82.23382   | 90.84504   | 55.315067  | 70.017204 | 80.98941   | 0.586204667  | -0.2985765   | -0.11213335  | -0.82634324 | -0.48811674 | -0.3041452   |
| 7904572 | 0.024409382 | ---       | ---                                                                                    | 1.6151546 | down | 146.41307  | 141.06688  | 85.74535   | 88.93798  | 137.24432  | 0.942289557  | 0.16131003   | 0.0863266    | -0.6053457  | -0.6076061  | 0.057885487  |
| 8081818 | 0.011945363 | ---       | ---                                                                                    | 1.6045625 | down | 339.29593  | 325.55875  | 202.68892  | 148.24821 | 146.3492   | 1.443076303  | 0.08267482   | 0.088002525  | -0.59417754 | -1.1069064  | -1.0689793   |
| 7919600 | 0.049350504 | ---       | ---                                                                                    | 1.5729862 | down | 209.28691  | 223.39671  | 142.75922  | 173.06644 | 171.80684  | 0.623782685  | -0.17487161  | -0.0905118   | -0.7440179  | -0.44538832 | -0.5958089   |
| 7903024 | 0.01203444  | ---       | ---                                                                                    | 1.5716616 | down | 67.93586   | 76.79313   | 48.730724  | 57.33965  | 70.78155   | 0.693222099  | -0.2252744   | -0.032713573 | -0.68500423 | -0.4512423  | -0.14551036  |
| 8172270 | 0.038922016 | ---       | ---                                                                                    | 1.5354728 | down | 466.22318  | 509.54333  | 335.17728  | 323.1923  | 445.58398  | 1.068734596  | -0.1335315   | 0.006768545  | -0.61191434 | -0.67787284 | -0.18978374  |
| 8089106 | 0.04073457  | ---       | ---                                                                                    | 1.5160339 | down | 59.97176   | 65.57586   | 43.796062  | 45.906483 | 48.41863   | 0.903101902  | -0.17171119  | -0.03786532  | -0.6381674  | -0.4743336  | -0.18757956  |
| 8020971 | 9.86E-04    | ---       | ---                                                                                    | 1.7142168 | up   | 172.86345  | 183.61086  | 313.52844  | 216.64131 | 129.00917  | 0.254241574  | -0.082261406 | 0.005055085  | 0.78305465  | 0.21918695  | -0.51757956  |
| 8166607 | 0.01        |           |                                                                                        |           |      |            |            |            |           |            |              |              |              |             |             |              |
